# Brassinosteroid Regulates Cell Elongation by Modulating Gibberellin Metabolism in Rice <sup>CIWJOPEN</sup>

Hongning Tong,<sup>a,1</sup> Yunhua Xiao,<sup>a,1</sup> Dapu Liu,<sup>a</sup> Shaopei Gao,<sup>a</sup> Linchuan Liu,<sup>a</sup> Yanhai Yin,<sup>b</sup> Yun Jin,<sup>c</sup> Qian Qian,<sup>d</sup> and Chengcai Chu<sup>a,2</sup>

<sup>a</sup>State Key Laboratory of Plant Genomics and National Center for Plant Gene Research (Beijing), Institute of Genetics and Developmental Biology, Chinese Academy of Sciences, Beijing 100101, China

<sup>b</sup>Department of Genetics, Development, and Cell Biology, Iowa State University, Ames, Iowa 50011

<sup>c</sup>Institute of Microbiology, Chinese Academy of Sciences, Beijing 100101, China

<sup>d</sup>State Key Laboratory of Rice Biology, China National Rice Research Institute, Chinese Academy of Agricultural Sciences, Hangzhou 310006, China

**Brassinosteroid (BR) and gibberellin (GA) are two predominant hormones regulating plant cell elongation. A defect in either of these leads to reduced plant growth and dwarfism. However, their relationship remains unknown in rice (*Oryza sativa*). Here, we demonstrated that BR regulates cell elongation by modulating GA metabolism in rice. Under physiological conditions, BR promotes GA accumulation by regulating the expression of GA metabolic genes to stimulate cell elongation. BR greatly induces the expression of *D18/GA3ox-2*, one of the GA biosynthetic genes, leading to increased GA<sub>1</sub> levels, the bioactive GA in rice seedlings. Consequently, both *d18* and loss-of-function GA-signaling mutants have decreased BR sensitivity. When excessive active BR is applied, the hormone mostly induces GA inactivation through upregulation of the GA inactivation gene *GA2ox-3* and also represses BR biosynthesis, resulting in decreased hormone levels and growth inhibition. As a feedback mechanism, GA extensively inhibits BR biosynthesis and the BR response. GA treatment decreases the enlarged leaf angles in plants with enhanced BR biosynthesis or signaling. Our results revealed a previously unknown mechanism underlying BR and GA crosstalk depending on tissues and hormone levels, which greatly advances our understanding of hormone actions in crop plants and appears much different from that in *Arabidopsis thaliana*.**

## INTRODUCTION

Among the plant hormones, brassinosteroid (BR) and gibberellin (GA) are the two most important ones that determine plant height by regulating cell elongation. In rice (*Oryza sativa*), mutants deficient in either GA or BR display a dwarf stature. Through studies of the corresponding mutants, significant progress has been made in the signaling as well as biosynthetic pathways of both GA and BR in recent years. In rice, GA is perceived by a soluble receptor, GIBBERELLIN-INSENSITIVE DWARF1 (GID1), which binds to GA directly, and also interacts with SLENDER1 (SLR1), the GA-signaling repressor encoding a DELLA family protein (Dill et al., 2001; Ikeda et al., 2001; Ueguchi-Tanaka et al., 2005, 2007). The stable triple complex (GA-GID1-DELLA) is then recognized by the SCF<sup>GID2</sup> (for Skp1-Cullin-F-box) E3 ubiquitin ligase complex, leading to the ubiquitination and, consequently, degradation of the DELLA repressor protein, thereby reversing

the repression of the GA response (Sasaki et al., 2003; Gomi et al., 2004; Tsuji et al., 2006; Ueguchi-Tanaka et al., 2006; Feng et al., 2008). Most of our knowledge about BR signaling was obtained from studies in *Arabidopsis thaliana*. A nearly complete primary signaling pathway has been established involving multiple components, including BRASSINOSTEROID-INSENSITIVE1 (BRI1), BRI1-ASSOCIATED RECEPTOR KINASE1 (BAK1), BRI1 KINASE INHIBITOR1, CONSTITUTIVE DIFFERENTIAL GROWTH1, BRASSINOSTEROID-SIGNALING KINASE1, *bri1*-SUPPRESSOR1, PROTEIN PHOSPHATASE 2A, BRASSINOSTEROID-INSENSITIVE2 (BIN2), *bri1*-EMS-SUPPRESSOR1 (BES1), and BRASSINAZOLE-RESISTANT1 (BZR1) (Li et al., 2001; Wang et al., 2001; He et al., 2002; Li and Nam, 2002; Nam and Li, 2002; Yin et al., 2002; Mora-García et al., 2004; Wang and Chory, 2006; Tang et al., 2008, 2011; Kim et al., 2011; Tong and Chu, 2012; Wang et al., 2012). In rice, several counterparts of the *Arabidopsis* BR primary signaling components have been identified, including Os BRI1, Os BAK1, Os BIN2 (named GSK2 for GSK3/SHAGGY-LIKE KINASE2 in rice), and Os BZR1, suggesting that rice has a conserved primary BR signaling pathway like *Arabidopsis* (Yamamoto et al., 2000; Bai et al., 2007; Li et al., 2009; Tong and Chu, 2012; Tong et al., 2012). As a feedback mechanism, activation of both GA and BR signaling inhibits their respective biosynthesis to fine-tune the hormone response in vivo, with BZR1 and BES1 functioning in this process by inhibiting BR biosynthesis (Hedden and Phillips, 2000; He et al., 2005; Sun et al., 2010; Yu et al., 2011).

It is clear that GA interacts with other phytohormones, including BR, to regulate plant growth and development (Weiss

<sup>1</sup> These authors contributed equally to this work.

<sup>2</sup> Address correspondence to ccchu@genetics.ac.cn.

The author responsible for distribution of materials integral to the findings presented in this article in accordance with the policy described in the Instructions for Authors (www.plantcell.org) is: Chengcai Chu (ccchu@genetics.ac.cn).

Some figures in this article are displayed in color online but in black and white in the print edition.

Online version contains Web-only data.

Articles can be viewed online without a subscription.

www.plantcell.org/cgi/doi/10.1105/tpc.114.132092

and Ori, 2007). While both GA and BR are growth-promoting hormones, an early study found that BR and GA act antagonistically to regulate the expression of a GA-responsive gene, *GASA1* (for GA-stimulated transcript in *Arabidopsis*), as well as a GA biosynthetic gene, *GA5* (Bouquin et al., 2001). BR induces the expression of *GA5*, which encodes a GA 20-oxidase (*GA20ox*) involved in GA biosynthesis. In another study, BR was also found to induce several GA biosynthetic genes, including *GA20ox-1*, *GA20ox-2*, and *GA20ox-5*, in *Arabidopsis* (Lilley et al., 2013). These results suggest that BR might act by upregulating GA levels to promote plant growth. However, metabolic studies using pea (*Pisum sativum*) mutants suggest that BR negatively regulates GA precursors, but the regulation does not lead to correlated changes in bioactive GA (Jager et al., 2005). Several rice genes have been shown to participate in both BR and GA responses, including *SPINDLY*, *GSR1* (for GA-stimulated transcript in rice), and *DWARF1 (D1)* (Ueguchi-Tanaka et al., 2000; Shimada et al., 2006; Wang et al., 2006, 2009; Oki et al., 2009a). In rice root, BR application appears to repress the levels of active GA by inhibiting the expression of *GA20ox-3*, a GA biosynthetic gene, and by simultaneously promoting the expression of *GA2ox-3*, a GA inactivation gene (De Vleeschauwer et al., 2012). These results suggest that BR and GA have a complex crosstalk depending on species or tissue.

Recently, important progress has been made in understanding the crosstalk between GA and BR in *Arabidopsis* (Bai et al., 2012; Gallego-Bartolomé et al., 2012; Li et al., 2012). A BR-deficient mutant and a BR-insensitive mutant were found to be insensitive to GA, suggesting that both BR biosynthesis and signaling are required for a normal response to GA (Bai et al., 2012; Gallego-Bartolomé et al., 2012). GA-deficient or GA-insensitive mutants are sensitive to BR, whereas a mutant lacking DELLA proteins has greatly enhanced BR sensitivity (Bai et al., 2012). DELLAs can interact directly with BZR1, the downstream transcription factor of BR signaling, leading to inhibition of its DNA binding activity (Bai et al., 2012; Gallego-Bartolomé et al., 2012; Li et al., 2012). As BR-induced BZR1 dephosphorylation is essential for its nuclear accumulation and transcriptional activity, the BZR1-mediated GA response through DELLA derepression ought to require BR biosynthesis and signaling. Thus, both GA and BR can inactivate their respective repressors, DELLAs and BIN2, thereby activating BZR1 to regulate a number of downstream target genes involved in cell elongation. Interestingly, a more recent study showed that the relationship between GA and BR depends on the developmental stages of *Arabidopsis* photomorphogenesis (Lilley et al., 2013). This study revealed that, at certain stages, BR application induces the accumulation of DELLAs in an opposite way to GA to regulate *Arabidopsis* growth.

A certain hormone could have opposite effects on plant growth and development, depending on the concentration and tissue. This effect is well documented with BR. In *Arabidopsis*, low concentrations of BR promote the growth of both the root and hypocotyl, whereas high concentrations of BR inhibit root growth but still promote hypocotyl growth (Müssig et al., 2003). Intriguingly, BR has been found to have opposite effects on the formation of stomata in cotyledons and hypocotyls (Gudesblat et al., 2012; Kim et al., 2012; Serna, 2013). Similarly, in rice, BR significantly promotes coleoptile growth, but a relatively higher concentration of

BR would inhibit both root and seedling growth (Tong et al., 2009). Consistent with this phenomenon, mutants or transgenic plants with enhanced BR levels or BR signaling usually have reduced plant height in rice, to a greater or lesser extent, including the *D11* activation mutant (Wan et al., 2009), *BRASSINOSTEROID UP-REGULATED1 (BU1)* overexpressor (Tanaka et al., 2009), *BAK1* overexpressor (Wang et al., 2007), *leaf and tiller angle increased controller (lic)* mutant and *LIC* antisense lines (Wang et al., 2008; Zhang et al., 2012), *Os MADS22/47/55* knockdown plants (Lee et al., 2008), *DWARF AND LOW-TILLERING (DLT)* overexpressor, and *GSK2* knockdown lines (Tong et al., 2012).

Correspondingly, plants may use various signaling pathways in response to different hormone concentrations. GA sensitivity tests revealed that the rice dwarf mutant *d1* is only less sensitive to low concentrations of GA, but not to high concentrations of GA, compared with the wild type, indicating the existence of a specific pathway in response to high GA levels (Ueguchi-Tanaka et al., 2000). A study of GA metabolic genes in tobacco (*Nicotiana tabacum*) revealed that the expression levels of these genes have various sensitivities to different GA concentrations (Gallego-Giraldo et al., 2008). In the BR pathway, BZR1 and LIC, both substrates of GSK3-like kinase, have been suggested to act antagonistically in response to low BR and high BR, respectively (Zhang et al., 2012).

In this study, we endeavored to uncover the relationship between BR and GA responses and to decipher how these two growth-promoting hormones affect each other by using a number of BR- and GA-related mutants. We also tried to determine why a relatively high BR level tends to inhibit plant growth in certain tissues. Our results revealed that BR and GA exhibit crosstalk with each other using complex mechanisms, depending on tissue and hormone level. Under low BR levels, BR induces GA biosynthesis and inhibits GA inactivation, leading to increased GA levels and cell elongation, while under high BR levels, GA inactivation is predominantly induced by BR, contributing to the inhibition of cell elongation in certain tissues. On the other hand, under low GA levels, GA represses BR signaling as well as BR biosynthesis through a feedback mechanism, while under high GA levels, GA can somehow activate the primary BR signaling pathway to facilitate cell elongation.

## RESULTS

### Effects of Exogenous BR on Rice Growth

While BR-deficient mutants usually display decreased leaf length, erect leaves, reduced plant height, and shortened roots, exogenous BR application could have inhibitory effects on rice growth and development. We evaluated the effects of exogenous BR on rice seedling growth in terms of plant height, lamina inclination, coleoptile growth, and root elongation (Figure 1), using increasing concentrations of brassinolide (BL), the most active BR. We found that BL greatly promoted coleoptile growth as well as lamina inclination when the concentration reached  $10^{-8}$  M or greater (Figures 1A to 1C). At  $10^{-5}$  M BL, the coleoptile elongated to ~3-fold the length of plants not subjected to exogenous BL application.

In leaves and roots, a low concentration of BL ( $10^{-9}$  M) only slightly enhanced leaf sheath and root length, and the increase

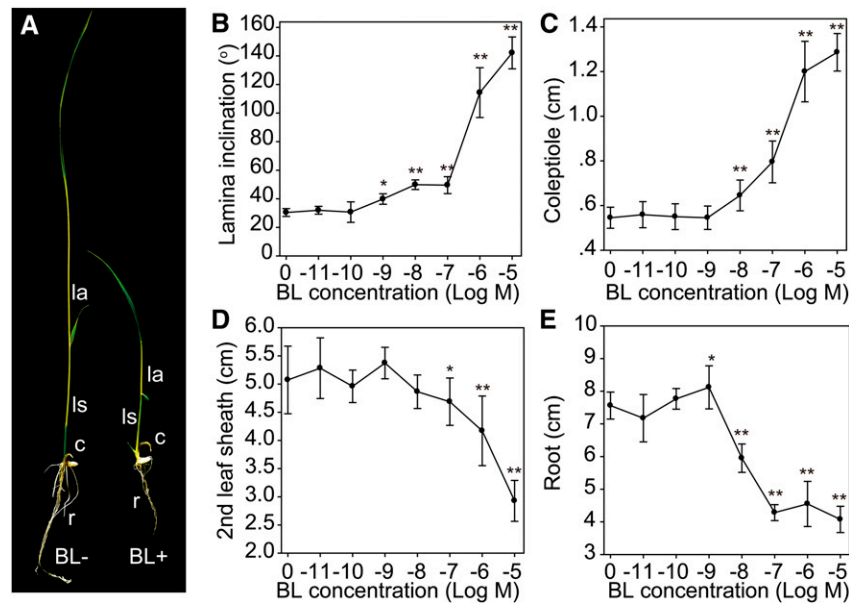

**Figure 1.** Effects of BR on Rice Seedling Growth.

(A) One-week-old rice seedlings grown with (BL+) or without (BL-)  $10^{-6}$  M BL. c, coleoptile; la, leaf angle; ls, leaf sheath; r, root.

(B) to (E) Statistical data of BL effects on leaf angle (B) and coleoptile (C), leaf sheath (D), and root (E) growth. Error bars indicate SD ( $n = 15$ ). Asterisks indicate  $P < 0.05$  (\*) and  $P < 0.01$  (\*\*) in Student's *t* test analysis.

[See online article for color version of this figure.]

was insignificant in leaf sheaths (Figures 1D and 1E). Considering that exogenous BL normally rescues the dwarf phenotype of BR-deficient mutants (Hong et al., 2002, 2003; Mori et al., 2002; Tanabe et al., 2005), this result suggests that endogenous BR levels in the wild type might be close to saturated for promoting tissue growth in rice leaves. By contrast, a higher level of the hormone inhibited the growth of both leaf sheaths and roots, resulting in decreased seedling height and root length (Figure 1A). In our analysis, the highest BL application (i.e.,  $10^{-5}$  M) inhibited the lengths of both the second leaf sheath and root to about half of those without the hormone treatment. Microscopy analysis showed that the reduced length of the leaf sheath is attributed to the shortened longitudinal cell length (Supplemental Figure 1).

GA and BR have overlapping roles in promoting cell elongation of various tissues. Compared with BR, GA has a relatively minor role in promoting coleoptile elongation. A concentration of  $10^{-5}$  M  $GA_3$  increased coleoptile length by ~50% (Supplemental Figure 2A). Exogenous GA (from  $10^{-8}$  to  $10^{-4}$  M) greatly promoted leaf sheath elongation, resulting in sheaths that were up to 4-fold longer than those not treated with GA (Ueguchi-Tanaka et al., 2000). GA had little effect on root elongation, with a 20% increase being the greatest effect observed in our analysis (Supplemental Figure 2B).

### BR Induces the Expression of GA Biosynthetic Genes

To study the relationship between BR and GA, we collected, identified, and developed various BR- and GA-related plants (Supplemental Table 1). To explore whether BR affects GA biosynthesis, we analyzed the expression levels of several GA

metabolic genes in a number of representative BR mutants, including BR-deficient plants (*d2* and *d11*), BR-accumulated plants (*m107*), decreased BR-signaling plants (*d61-1*, *d61-2*, *Go-2*, and *dlt*), and enhanced BR-signaling plants (*Do-2*). Previous studies showed that five GA metabolic genes, *GA20ox-1*, *GA20ox-2*, *GA3ox-2*, *GA2ox-1*, and *GA2ox-3*, are the main targets for different biological pathways in rice (Kaneko et al., 2003; Dai et al., 2007). Three of these, *GA20ox-2*, *GA3ox-2*, and *GA2ox-3*, are mainly expressed and functional in seedlings, while *GA20ox-1* and *GA2ox-1* tend to be expressed and functional in reproductive tissues (Kaneko et al., 2003; Sakamoto et al., 2004). As young rice seedlings were used in this study, we focused on the expression of *GA20ox-2*, *GA3ox-2*, and *GA2ox-3* in our analysis. Strikingly, quantitative real-time RT-PCR (qRT-PCR) showed that, with rare exceptions, both *GA20ox-2* and *GA3ox-2* have decreased expression in all of the BR-deficient and decreased BR-signaling plants but increased expression in the BR-accumulated and enhanced BR-signaling plants, compared with their respective wild types (Figure 2). By contrast, *GA2ox-3*, the GA inactivation gene, has opposite expression patterns compared with GA biosynthetic genes. Thus, we concluded that BR promotes GA biosynthesis and inhibits GA inactivation and that BR signaling components are involved in both processes.

### BR Promotes Cell Elongation through Inducing GA Accumulation

The above results raised the interesting possibility that BR promotes cell elongation by upregulating GA level. To test this hypothesis, we first compared the coleoptile elongation extent of

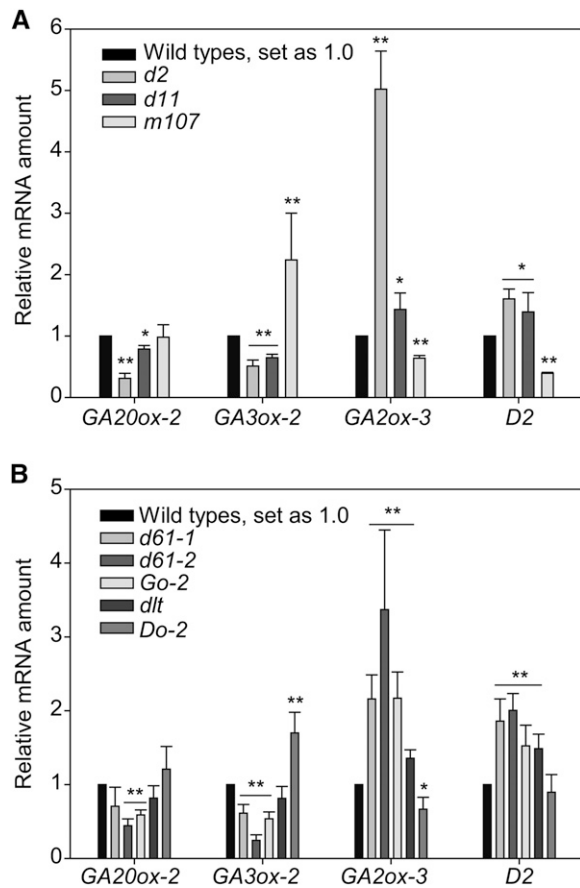

**Figure 2.** Expression of GA Metabolic Genes in Various BR-Related Mutants.

(A) Expression of the indicated genes in plants with altered BR biosynthesis.

(B) Expression of the indicated genes in plants with altered BR signaling. Error bars indicate *sd* ( $n = 3$ ). Asterisks indicate  $P < 0.05$  (\*) and  $P < 0.01$  (\*\*) in Student's *t* test analysis.

GA-related mutants with their respective wild types in response to exogenous BR. These plants include GA-deficient mutants (*sd1*, *d18*, and *d35*), decreased GA-signaling mutants (*gid1* and *gid2*), an enhanced GA-signaling mutant (*slr1*), and a GA-accumulated plant (*GA20-1ox*) (Supplemental Table 1). We found that, while *sd1* and *d35* had similar elongation curves to the wild types in response to different concentrations of BR, *d18*, *gid1*, and *gid2* had markedly decreased BR sensitivities (Figures 3A to 3C). For comparison, we calculated the elongation ratio of the coleoptile length under  $10^{-6}$  M BL compared with those without BL (Figures 3B to 3D). Specifically, *d18* had an elongation ratio of 2.1, which is less than that of the wild type (2.4). The ratios for *gid1* and *gid2* versus their respective wild types were 2.4:2.7 and 2.0:2.9. However, the ratio for *sd1* was 2.3, only slightly lower than the 2.4 of its wild type; and for *d35*, the ratio was 2.4, the same as that of the wild type. Notably, *slr1* appeared to have a decreased elongation ratio compared with its wild type (2.7:3.0) under  $10^{-6}$  M BL. However, under lower concentrations (e.g.,  $10^{-8}$  M), the ratio was 1.9:1.7

(Figure 3C), suggesting the increased BL sensitivity of the mutant. Therefore, *slr1* could have reached the maximum possible elongation of coleoptile under  $10^{-6}$  M BL with 2.1 cm in length, which is the longest in the tests. In addition, *GA20-1ox* plants had markedly increased BR sensitivities, with the elongation ratio of 2.3 versus 2.0 of the wild type. As both *sd1* and *d35* have unaltered BR sensitivities, we speculated that *D18/GA3ox-2* is one of the main targets for BR regulating cell elongation. Overexpression of *GA20ox-1* resulted in the accumulation of its catalyzed product,  $GA_{20}$ , the precursor of *GA3ox-2*, to produce bioactive  $GA_1$ , leading to the increased sensitivity of the plant to BR-induced *GA3ox-2* expression.

These results suggest that BR promotes coleoptile elongation at least partially by inducing GA accumulation. To confirm that the BR signaling pathway is involved in this process, we tested the coleoptile sensitivity of several BR mutants and transgenic plants in response to BR, including decreased BR-signaling plants (*d61-2*, *Go-2*, and *dlt*), enhanced BR-signaling plants (*Gi-2* and *Do-1*), and a BR-deficient plant (*d11*) (Supplemental Table 1). Also, we calculated the coleoptile length ratios between BR-treated and nontreated mutants and compared these with their respective wild-type ratios (Figures 3A and 3D). The ratio for *d61-2* versus the wild type was 1.7:2.9, for *Go-2* was 1.7:2.4, for *Gi-2* was 3.1:2.4, for *dlt* was 2.3:2.5, for *Do-1* was 3.1:2.5, and for *d11* was 2.3:2.4. These results, combined with previous results obtained from GA mutants, show that *D18/GA3ox-2* and GA signaling components act like these BR signaling components, all of which are important for BR-mediated coleoptile elongation.

#### Altered GA Levels in BR-Related Mutants

To provide further evidence for BR-induced GA accumulation, we directly analyzed the GA amounts in several representative BR mutants compared with their respective wild types. Consistent with the gene expression data, we found that both a BR-deficient mutant (*d11*) and decreased BR-signaling plants (*Go-2* and *dlt*) have markedly decreased  $GA_1$  levels compared with their respective wild types (Figure 4A). We also quantified the  $GA_1$  levels in three *Do* (for *DLT* overexpression) lines and found that all of these lines have slightly increased  $GA_1$  levels compared with the wild type (Supplemental Table 2). Although the increase is small, the  $GA_1$  levels are consistent with the plant heights of the three *Do* lines (Supplemental Figure 3A).

We further quantified the amounts of different forms of GA in BR accumulation line *m107* and its wild type (Figure 4B; Supplemental Table 3). Because of the activated expression of the BR biosynthetic gene *D11*, *m107* has greatly increased BR levels, as shown by direct BR (castasterone [CS], one of the active BRs) measurement (Supplemental Table 4). In contrast with the enhanced BR-signaling plants with inconspicuous height changes at the seedling stage, *m107* had greatly increased seedling height (Supplemental Figures 3A and 3B; represented by leaf sheath length) and is thus suitable material for evaluating the effect of endogenous BR application on GA level. Plants were grown in hydroponic culture medium for 2 weeks, and shoots were used for GA measurement. Whereas  $GA_{53}$  and  $GA_{44}$  had comparable levels in both plants,  $GA_1$  was greatly elevated in *m107* compared with its wild type, with an increase of  $\sim 5.7$ -fold; by contrast,  $GA_{19}$

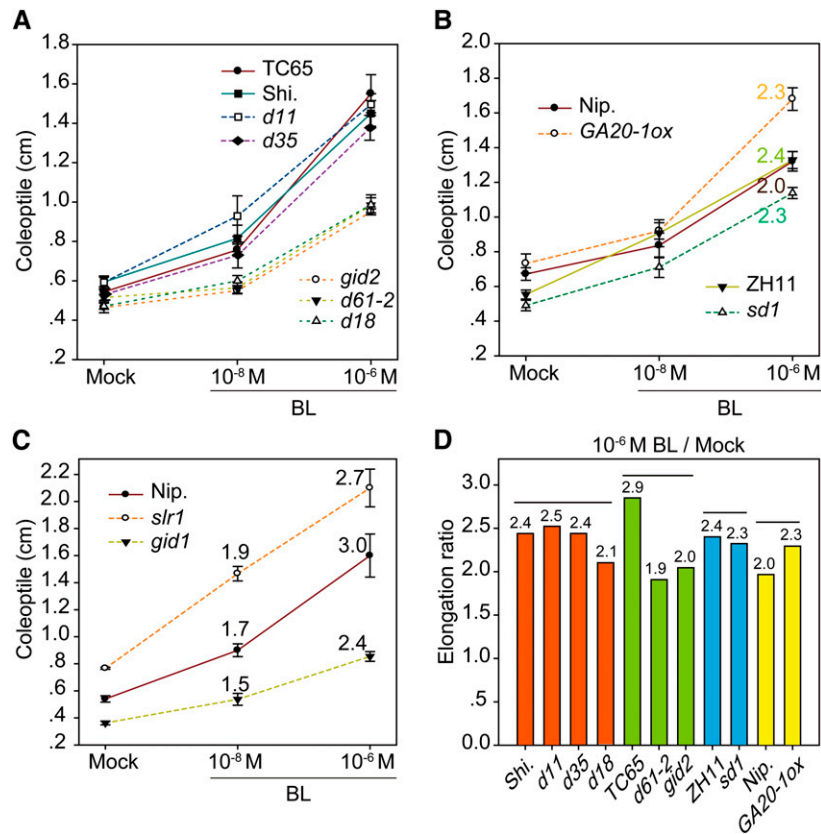

**Figure 3.** Coleoptile Elongation of GA-Related Mutants in Response to BR.

(A) to (C) Plants were grouped by different backgrounds or independent experiments. Dashed lines indicate mutants. Numbers indicate elongation ratios in (B) and (C). Error bars indicate *sd* ( $n = 8$  for *slr1*, *gid1*, and *gid2*;  $n = 15$  for others).

(D) Elongation ratios at  $10^{-6}$  M BL as analyzed in (A) and (B). Top lines and colors indicate groups classified with different backgrounds.

and  $GA_{20}$ , the precursors of  $GA_1$ , were largely decreased ~2- and 4-fold, respectively, with  $GA_{20}$  (the direct substrate of *GA3ox-2*) being reduced the most (Figure 4B). These results demonstrate that *D18/GA3ox-2*, which catalyzes  $GA_{20}$  oxidation to produce  $GA_1$ , is the main target for the BR-mediated upregulation of GA biosynthesis. In addition, the increase of  $GA_8$  and the decrease of  $GA_{29}$  are consistent with the altered  $GA_1$  and  $GA_{19}$ , respectively. We also used  $10^{-6}$  M BL to treat wild-type plants for 2 d and measured the GA levels at the same time. It should be mentioned that this kind of short-term treatment does not inhibit plant growth (Supplemental Figures 3C and 3D). The  $GA_1$  level increased by ~2.0-fold, while  $GA_{20}$  decreased (Supplemental Table 3). Interestingly, the increase of  $GA_1$  was much less than that in *m107*, suggesting that exogenous application of high levels of BL may have an additional negative role in inducing GA accumulation.

#### Expression of GA and BR Metabolic Genes in Response to Exogenous BR

Next, we analyzed the expression levels of GA and BR metabolic genes, including *GA20ox-2*, *GA3ox-2*, *GA2ox-3*, *D2*, and *D11*, in response to various exogenous BL concentrations, from  $10^{-10}$

to  $10^{-5}$  M. Young rice seedlings were treated for 2 d before sampling for the analysis. *GA3ox-2* expression gradually increased with the increased BL concentrations, further strengthening our previous conclusion that BL increases GA levels (Figure 4C). However, very strikingly, all the other genes have a differential but coordinated response to the increasing BL gradient. From  $10^{-10}$  to  $10^{-9}$  M BL, expression levels of *GA20ox-2*, *D2*, and *D11* were gradually increased, but *GA2ox-3* decreased, while from  $10^{-8}$  to  $10^{-5}$  M, their expression tendencies were reversed (Figures 4D and 4E; Supplemental Figure 4). Notably, the expression of all of these genes had a turning point at the concentration of  $10^{-9}$  M, in concert with the increase in leaf sheath and root elongation observed at  $10^{-9}$  M BL (Figures 1D and 1E). Interestingly, this kind of short-term treatment tended to have a more obvious promotional effect on plant growth (Supplemental Figures 3C and 3D). These results suggest that high BR levels inhibit rice growth by repressing both GA and BR biosynthesis.

To test if high BL levels indeed suppress GA levels, we treated wild-type plants with  $10^{-6}$  and  $10^{-5}$  M BL for 1 week and then measured the GA levels in the plant shoots. Consistent with the greatly decreased plant height, both the treatments led to marked decreases in  $GA_1$  levels, with  $10^{-5}$  M treatment having a stronger

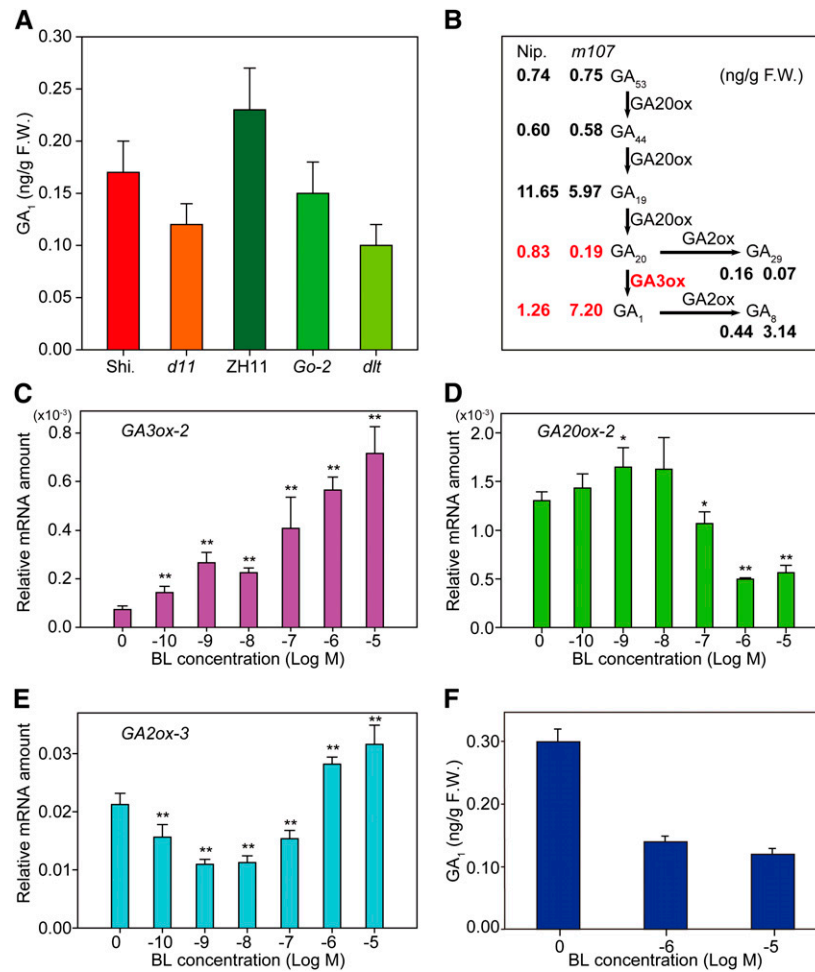

**Figure 4.** Quantification of GA Amount in BR-Related Mutants and BR Effects on GA Metabolic Genes.

**(A)** Bioactive GA<sub>1</sub> levels in the wild type and BR-related mutants. One-month-old seedling shoots were used for the measurements. Error bars indicate SD ( $n = 3$ ). F.W., fresh weight.

**(B)** Levels of different GA forms in Nip. and *m107*. Two-week-old seedling shoots were used for the measurements. Average values of three replicates are shown. See Supplemental Table 3 for SD. GA20ox, GA3ox, and GA2ox and the reaction processes they catalyzed are indicated. Steps with the most prominent changes are marked in red.

**(C) to (E)** Expression changes of GA and BR metabolic genes in response to BL in rice shoot, including *GA3ox-2* (**C**), *GA20ox-2* (**D**), and *GA2ox-3* (**E**). Error bars indicate SD ( $n = 3$ ). Asterisks indicate  $P < 0.05$  (\*) and  $P < 0.01$  (\*\*) in Student's *t* test analysis.

**(F)** GA<sub>1</sub> levels in mock- and high-BL-treated plants. Error bars indicate SD ( $n = 3$ ).

effect (Figure 4F). Interestingly, all of the other detected forms of GAs also exhibited decreased levels (Supplemental Table 5).

#### Decreased Sensitivity of GA Mutants to BR-Mediated Inhibition of Leaf Growth

If exogenous BR inhibits leaf sheath and root elongation through reducing GA and BR levels, both GA and BR mutants should have altered sensitivity to BL in terms of its inhibitory effect on the growth of both leaf sheath and root. We first analyzed the BR responses of various GA mutants in leaf sheath under  $10^{-6}$  M BL (Figures 5A to 5D). As expected, we found that while *d61-2*, the BR receptor mutant, is totally insensitive to BL-mediated inhibition of leaf sheath elongation (Figure 5A), *d2* and *d11*, two

BR biosynthetic mutants, also showed insensitivity (Figure 5B). In addition, most of the GA mutants analyzed are nearly completely insensitive to BL-mediated inhibition of leaf sheath elongation, including *d18*, *d35*, *sd1*, *gid1*, *gid2*, and *sr1*.

If *GA20ox-2* is one of the transcriptional targets of BR-mediated inhibition of cell elongation, overexpressing its homolog *GA20ox-1*, which functions redundantly with *GA20ox-2*, should make plants resistant to the inhibitory effect of high levels of BR. However, we found that *GA20-1ox* plants have increased sensitivity (Figure 5D). Therefore, we suspected that *GA2ox-3* is the major target. *GA20-1ox* has enhanced GA<sub>1</sub> levels, resulting in increased sensitivity to BR-induced *GA2ox-3* expression. If this is the case, overexpressing its functional redundant homolog, *GA2ox-1*, should make plants resistant to the growth inhibition caused by high

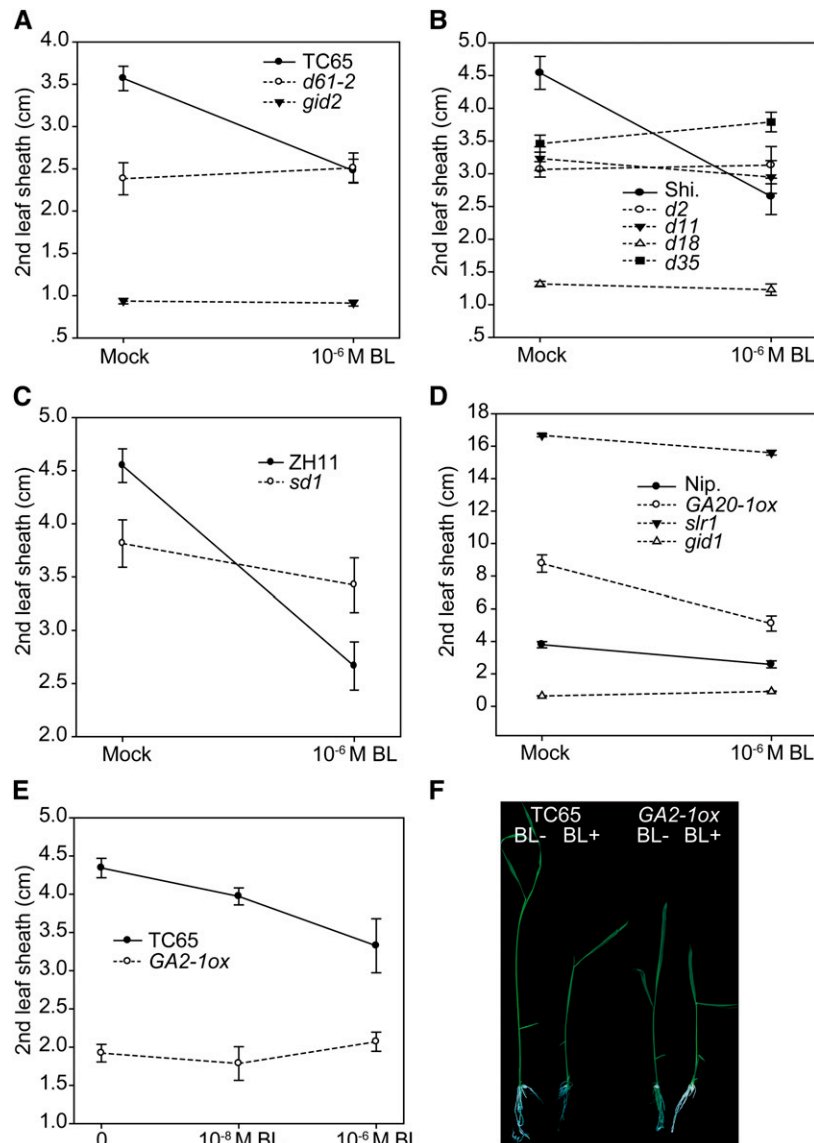

**Figure 5.** Effects of BR on Leaf Sheath Elongation of GA- and BR-Related Mutants.

Plants were grouped by different backgrounds or independent experiments. Dashed lines indicate mutants. Error bars indicate  $SD$  ( $n = 8$  for *slr1*, *gid1*, and *gid2*;  $n = 15$  for others). Representative seedling morphology of TC65 and *GA2-1ox* grown with or without  $10^{-6}$  M BL is shown in (F). [See online article for color version of this figure.]

levels of BR. We then generated *GA2ox-1* overexpression plants (designated as *GA2-1ox*), which are dwarfed. Consistent with our speculation, a sensitivity test showed that the leaf sheath of the transgenic plant is totally insensitive to  $10^{-6}$  M BL application (Figures 5E and 5F). Thus, we concluded that *GA2ox-3* is the major transcriptional target for BR-mediated inhibition of cell elongation.

#### Decreased Sensitivity of GA Mutants to Exogenous BR Inhibition in Root

We observed similar results in the root, but not to the same extent as in the leaf sheath (Supplemental Figure 5). For instance, *d61*,

*d18*, *d35*, *gid1*, *gid2*, and *slr1* also had decreased sensitivity to BL-mediated inhibition of root growth, but the extent was less than that in leaf sheaths. However, unlike the insensitivity of *d2* and *d11* mutants to BL-mediated inhibition on leaf sheath elongation, both of these mutants had a normal response in root sensitivity tests, suggesting that BL-mediated inhibition of roots does not rely on negative feedback regulation of these BR biosynthetic genes. In addition, *sd1* and *GA2-1ox* had no obvious changes in sensitivity to high levels of BR. Accordingly, we found that *sd1* had longer roots while *GA2-1ox* had shorter roots compared with their respective wild types. Considering the unchanged root length in *d2*, *d11*, and even *brd1*, the most severe

BR-deficient mutant (Supplemental Table 1) (Mori et al., 2002), rice root systems may have more complex mechanisms than aerial tissues that regulate growth (González-García et al., 2011; Fábregas et al., 2013).

### Exogenous GA Inhibits the BR Response

Unexpectedly, we found that GA appears to slightly inhibit wild-type leaf angles, whereas paclobutrazol (PAC), a GA biosynthesis inhibitor, slightly increased the leaf angles (Figures 6A and 6B).

The GA-mediated inhibition tended to be reverted when GA concentrations exceeded  $10^{-6}$  M in the wild type. However, the effects were not significant. Thus, we further used *m107* as material to carry out the analysis, as it has greatly enlarged leaf angles due to elevated rates of BR biosynthesis (Wan et al., 2009). Consistently, we found that GA strikingly inhibited lamina bending, even at the very low concentration of  $\sim 10^{-9}$  M (Figure 6B). A concentration of  $10^{-6}$  M GA reduced the second leaf angle from  $93^\circ$  to  $\sim 16^\circ$  (Figures 6A and 6B), demonstrating that GA is a negative regulator of lamina inclination. We noted that

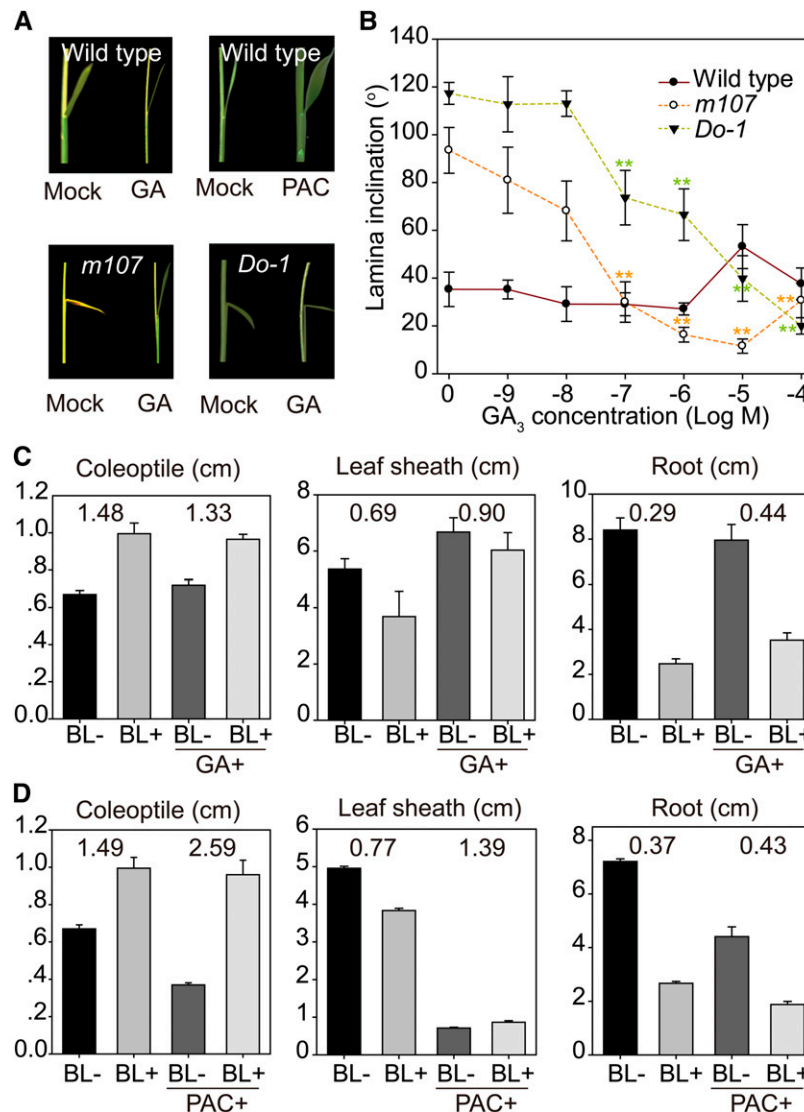

**Figure 6.** GA Inhibits BR Responses.

(A) Lamina inclination of the second leaf in wild-type, *m107*, and *Do-1* plants subjected to GA or PAC treatment.

(B) Responses of lamina inclination in the wild type, *m107*, and *Do-1* to different GA concentrations. Error bars indicate sd ( $n = 10$ ). Asterisks indicate  $P < 0.01$  (\*\*) in Student's *t* test analysis.

(C) and (D) Effects of GA (C) and GA inhibitor (D) on BR sensitivity in various tissues. Length ratios of BL-treated and nontreated tissues were calculated and are shown.

Concentrations of  $10^{-6}$  M GA,  $10^{-6}$  M BR, and  $10^{-5}$  M PAC were used for the treatments in (A), (C), and (D). Error bars indicate sd ( $n = 15$ ).

[See online article for color version of this figure.]



the inhibition was also alleviated when GA concentration reached  $10^{-4}$  M, higher than the  $10^{-5}$  M in wild-type treatment. To test whether the inhibition is mediated through the BR-signaling pathway, we performed a similar analysis using *Do-1*, a weak *DLT* overexpression line, which also has enlarged leaf angles because of enhanced BR sensitivity (Tong et al., 2012). We found that GA also inhibited *Do-1* lamina bending, but only when the concentration reached  $10^{-7}$  M (Figure 6B). In addition, the inhibition was much less than in *m107* at  $10^{-6}$  and  $10^{-5}$  M GA (Figures 6A and 6B). Moreover, alleviation of GA-mediated inhibition of lamina inclination was not observed even at  $10^{-4}$  M GA in *Do-1*. Thus, compared with *m107* with enhanced BR biosynthesis, the enhancement of BR signaling leads to resistance to GA inhibition, demonstrating that GA-mediated inhibition on lamina inclination is mediated through the BR-signaling pathway.

As lamina bending is generally believed to be a specific BR response in rice, we considered that exogenous GA might also repress other BR responses. To this end, we further analyzed the effects of GA on BR responses in the coleoptile, leaf sheath, and root in the wild type (Figure 6C). Indeed, application of  $10^{-6}$  M GA decreased the BR effects in all three tissues, either promoting or inhibiting growth (as determined by comparing the length ratio between BL-treated and nontreated plants). We also tested the effects of  $10^{-5}$  M PAC on BR responses in these tissues. However, PAC greatly increased the BR response in promoting coleoptile growth but repressed the BR sensitivity in inhibiting leaf sheath and root growth (Figure 6D), suggesting that BR functions in different tissues via different mechanisms involving GA biosynthesis regulation. These results are consistent with the decreased sensitivity of GA-deficient mutants to BL-mediated inhibition of leaf sheath elongation (Figure 5). A reduction of any GA precursor by either gene mutation or PAC treatment would lead to decreased sensitivity of plants to BL-repressed *GA20ox-2* or induced *GA2ox-3* expression. In addition, exogenous GA application also decreased the plant's sensitivity to BR-mediated inhibition (Figure 6C), because exogenous GA is supplied in great excess while the *in vivo* GA-modulating process has little effect on the GA level in planta.

### GA Inhibits BR Signaling as Well as BR Biosynthesis

Having established that exogenous GA inhibits the BR response, we further investigated whether endogenous GA has a similar effect on the BR response. Thus, we used several GA metabolic mutants to analyze their BR response using a lamina-bending experiment that was thought to detect a BR-specific response (Figures 7A and 7B). In the test, we found that *d18*, the GA-deficient mutant, had a markedly increased leaf angle as well as enhanced BR sensitivity; by contrast, *eui1*, a GA-accumulated mutant with defects in a GA inactivation gene (Supplemental Table 1) (Luo et al., 2006; Nomura et al., 2006; Zhu et al., 2006), had the opposite phenotype and decreased BR sensitivity. These results demonstrate that GA indeed inhibits the BR response.

To verify this result, we quantified the protein level of GSK2, the central negative regulator of BR signaling, and BZR1, the downstream positive regulator of BR signaling, under  $10^{-5}$  M GA treatment (Figure 7C). In contrast with the effect of BL, GSK2 was induced by GA, whereas BZR1 had decreased levels under

GA treatment. A further treatment using a gradient of GA concentrations led to a similar result (Supplemental Figure 6), further proving that GA inhibits the BR response.

To investigate whether GA also inhibits BR biosynthesis, we performed qRT-PCR to determine the expression of two BR biosynthetic genes, *D2* and *D11*, in various GA-related mutants, including a GA-deficient mutant (*d18*), GA-accumulated plants (*eui1* and *GA20-1ox*), and a decreased GA-signaling mutant (*gid2*) (Supplemental Table 1), and to compare these values with those in their respective wild types. Both *D2* and *D11* had consistently increased expression in GA-deficient and decreased GA-signaling mutants (*d18* and *gid2*) but decreased expression in GA-accumulated plants (*eui1* and *GA20-1ox*) (Figures 7D and 7E). We also analyzed the effect of exogenous GA on *D2* and *D11* expression and found that, similar to the GA biosynthetic genes, including *GA20ox-2* and *GA3ox-2*, both of these genes were repressed by GA application (Figure 7F). Taken together, these results suggest that GA inhibits both BR biosynthesis and the BR response.

### Altered GA Sensitivity of BR-Related Mutants

Next, we sought to determine the effects of BR on the GA response. As exogenous BR usually inhibits leaf sheath growth, we directly used a number of BR-related mutants to carry out the second leaf sheath elongation analysis in response to GA (Figure 8). These plants include a BR-deficient plant (*d2*), a BR-accumulated plant (*m107*), and decreased BR-signaling plants (*d61-2*, *Go-2*, and *dlt*) (Supplemental Table 1). Compared with their respective wild types, *d2*, as well as the brassinazole (BRZ)-treated plants (the BR biosynthesis inhibitor), have increased GA sensitivity (Figure 8A), while *m107* has decreased GA sensitivity (Figure 8B). Interestingly, those decreased BR-signaling plants, including *d61-2*, *Go-2*, and *dlt*, have slightly enhanced sensitivity under low concentrations of GA ( $10^{-9}$  to  $10^{-7}$  M) but have markedly decreased sensitivity under high concentrations of GA ( $10^{-6}$  to  $10^{-4}$  M) (Figures 8C to 8E). For example, under  $10^{-7}$  M GA, the second leaf sheath of *d61-2* elongated 2.7-fold compared with that not treated with GA, which is more than the 2.0-fold of the wild type. However, under  $10^{-4}$  M, *d61-2* elongated 6.5-fold, less than the 7.3-fold of the wild type. These results suggest that BR signaling components (BRI1-GSK2-DLT) are essential for the response to high GA concentrations but are not needed for the response to low GA concentrations close to physiological GA levels. The increased sensitivities in plants with deficient BR or decreased BR signaling are caused by the decreased GA levels in these plants, as PAC-treated plants also have increased GA sensitivity (Figure 8F).

### BZR1 Directly Binds to Promoters of GA Biosynthetic Genes to Regulate Their Expression

In *Arabidopsis*, BZR1/BES1 family proteins were thought to be the primary transcription factors regulating huge numbers of genes involved in BR signal output (Sun et al., 2010; Yu et al., 2011). Rice BZR1 has been suggested to play a conserved role as in *Arabidopsis* (Bai et al., 2007; Tong et al., 2012). We then considered whether BZR1 could directly bind to GA and BR

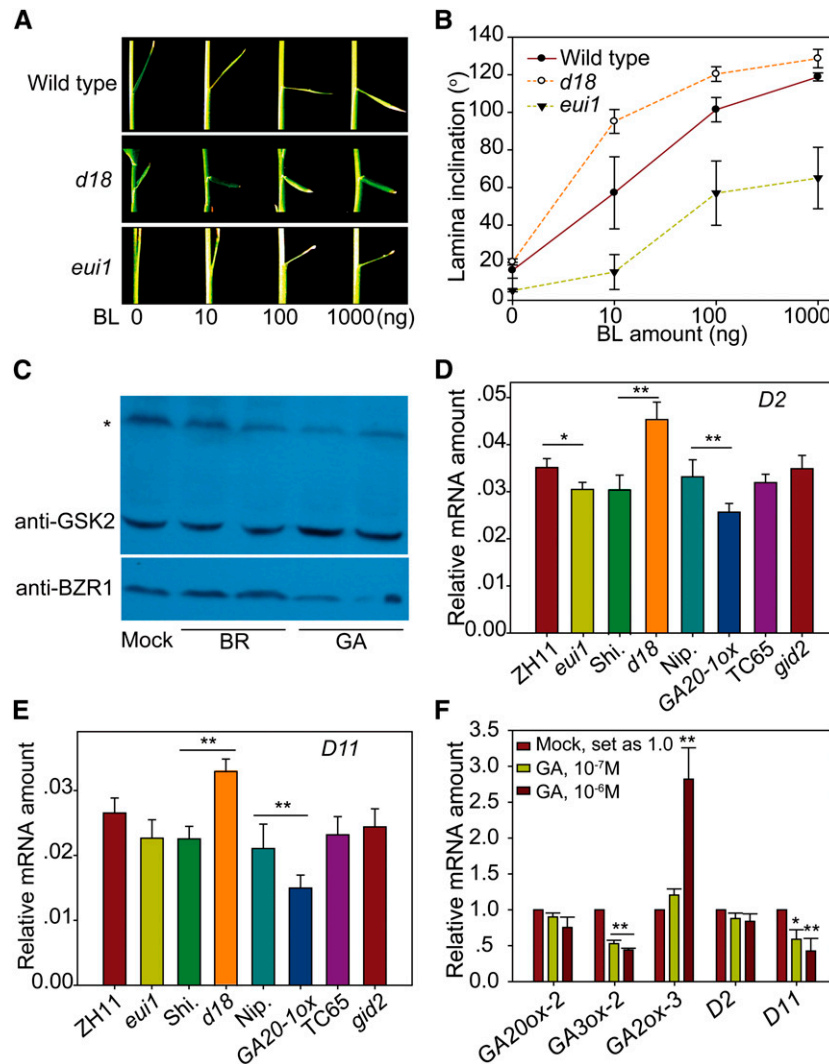

**Figure 7.** GA Extensively Inhibits BR Signaling as Well as BR Biosynthesis.

(A) BR response of the wild type, *d18*, and *eui1* in lamina inclination tests.

(B) Statistical analysis of the results shown in (A). Error bars indicate  $SD$  ( $n = 12$ ).

(C) Detection of GSK2 and BZR1 by immunoblot analysis under  $10^{-6}$  M BR and  $10^{-5}$  M GA treatment. The asterisk marks an unspecific band that was used as a reference.

(D) and (E) Expression of *D2* (D) and *D11* (E) in GA-related mutant plants compared with their respective wild types. Error bars indicate  $SD$  ( $n = 3$ ). Asterisks indicate  $P < 0.05$  (\*) and  $P < 0.01$  (\*\*) in Student's *t* test analysis.

(F) Effects of GA treatment on the expression of GA and BR metabolic genes. Error bars indicate  $SD$  ( $n = 3$ ). Asterisks indicate  $P < 0.05$  (\*) and  $P < 0.01$  (\*\*) in Student's *t* test analysis.

biosynthetic genes in rice to regulate their expression. According to previous reports in *Arabidopsis*, BZR1/BES1 binds to BRRE and G-box elements to mostly repress gene expression but binds to CATGTG to primarily stimulate gene expression (Sun et al., 2010; Yu et al., 2011). Interestingly, analysis of the promoters of *GA20ox-2*, *GA3ox-2*, *GA2ox-3*, and *D2* revealed that each of these promoters contained one CATGTG element; however, except for the *GA3ox-2* promoter, the other promoters also contained several BRREs or G-box elements (Figure 9A). These observations are consistent with the finding that *GA3ox-2*

was always induced by BL, whereas the other genes are either induced or repressed by BL (Figures 4C to 4E; Supplemental Figure 4), strongly suggesting that rice BZR1 is a direct regulator of these genes. We then conducted a chromatin immunoprecipitation (ChIP) assay to detect BZR1 binding to these elements. Quantitative PCR (qPCR) analysis of the output DNA revealed that most of the regions containing these elements were enriched when rice BZR1 antibody was applied, except for two regions (*GA20ox-2* p2 and *GA3ox-2* p1) as well as two negative controls (*GA2ox-3* 3' untranslated region and *DLT* coding region), which

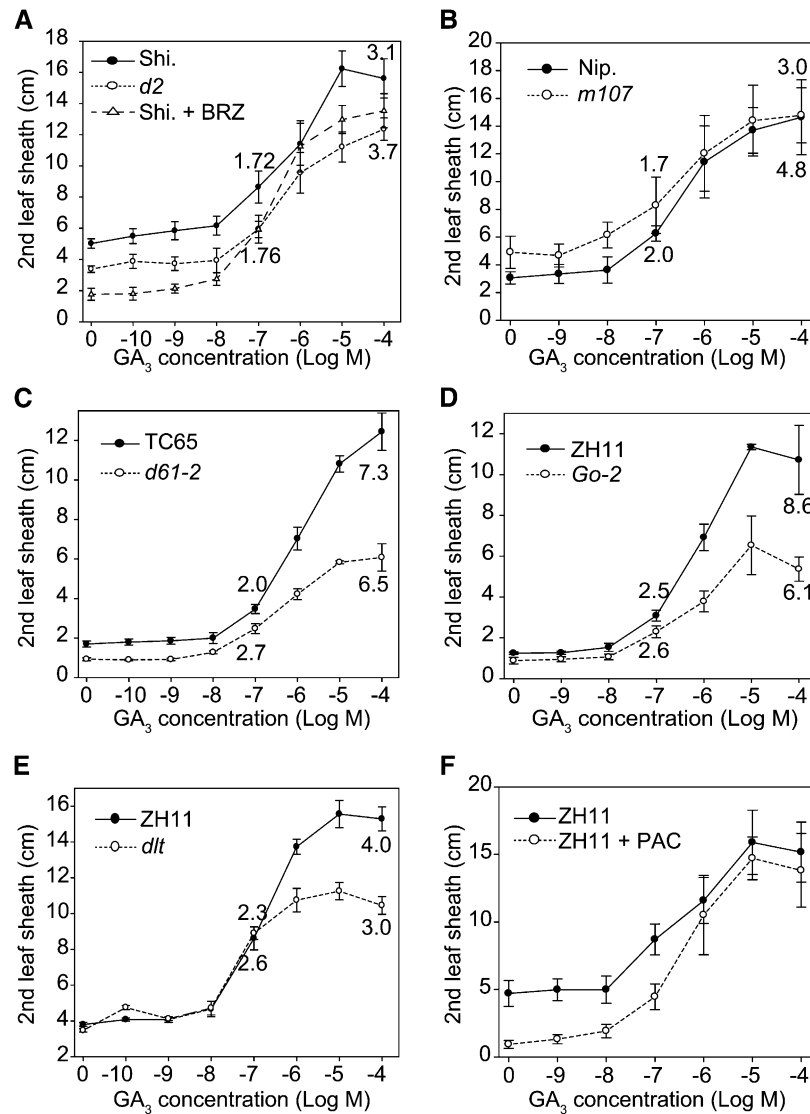

**Figure 8.** Responses of BR-Related Mutants to Different Concentrations of GA.

Plants are as follows: *d2* and BRZ-treated plants (**A**), *m107* (**B**), *d61-2* (**C**), *Go-2* (**D**), *dlt* (**E**), and PAC-treated plants (**F**). The elongation ratios of the leaf sheath lengths between GA-treated and nontreated leaves were calculated and are shown. Error bars indicate  $SD$  ( $n = 10$ ).

have no enrichment (Figure 9B). These results support the hypothesis that rice BZR1 binds to the promoters of these genes to regulate their expression.

## DISCUSSION

Promotion of cell elongation is the shared function of BR and GA, and dwarfism is the most common phenotype of their deficient mutants in rice. It is possible that BR and GA interact closely to regulate cell elongation. In this study, we explored the BR-GA crosstalk concerning their overlapping roles in promoting cell elongation by genetic, physiological, hormone quantification, and gene expression analyses. Our results demonstrated that BR modulates GA metabolism to regulate cell elongation, and

*D18/GA3ox-2* could be the major target for endogenous BR to promote GA biosynthesis and to induce cell elongation, while *GA2ox-3* could be the target for an exogenous high concentration of BR to inactive GA and to inhibit cell elongation. Physiological GA inhibits both BR signaling and BR biosynthesis, likely in a feedback inhibitory loop. However, high exogenous GA levels activate the primary BR signaling pathway to facilitate cell elongation (Figure 10).

Our results showed that BR-related mutants are tightly associated with GA metabolic gene expression as well as GA levels, strongly suggesting that BR promotes rice cell elongation by upregulating GA biosynthesis. The insensitivity of relative GA mutants to BR further strengthened our conclusion. To our surprise, we showed that GA inhibits lamina inclination, and the

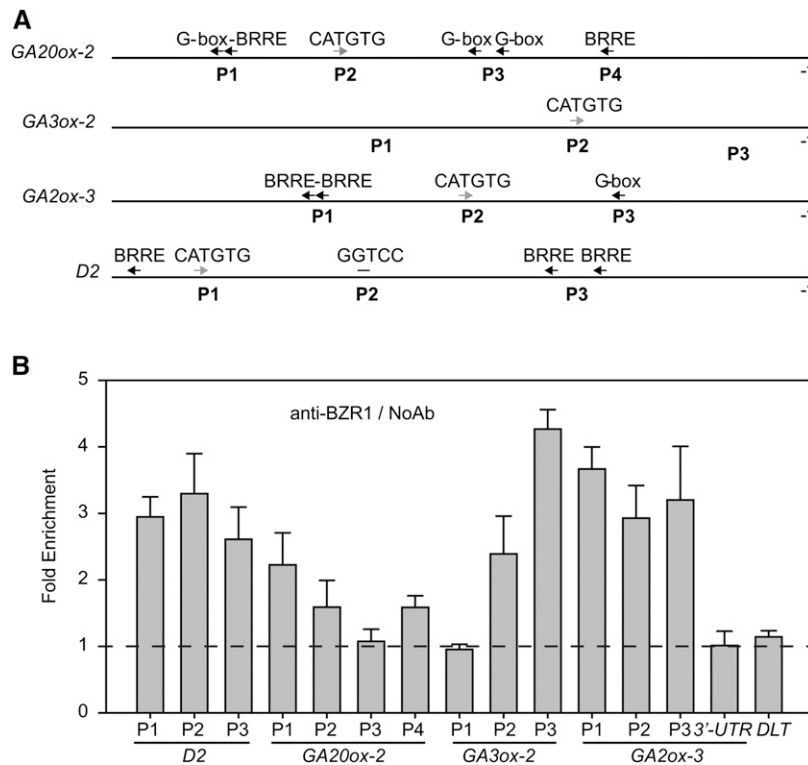

**Figure 9.** Os BZR1 Can Directly Bind to the Promoters of *GA20ox-2*, *GA3ox-2*, *GA2ox-3*, and *D2*.

**(A)** Distribution of BZR1 binding *cis*-elements in the 2-kb region preceding the initial codon (−1) of *GA20ox-2*, *GA3ox-2*, *GA2ox-3*, and *D2*. Gray and black arrows indicate that BZR1 binding could presumably promote and repress gene expression, respectively, according to a previous report.

**(B)** Enrichment fold of Os BZR1 binding sites compared with the samples without antibody application (NoAb) by qPCR analysis. The amplified regions are indicated in **(A)**. All values were normalized to an unrelated *ACTIN1* intron region, and segments located in the *GA2ox-3* 3' untranslated region (UTR) and *DLT* coding region were used as negative controls.

inhibition becomes more obvious in plants with accumulated BR or enhanced BR signaling. It is known that defective elongation/division of the abaxial cells at the lamina joint usually leads to erect leaves, a characteristic of BR-deficient mutants in rice (Hong et al., 2004; Duan et al., 2006; Zhao et al., 2010), which is not obvious and rarely reported in GA-deficient mutants. One possibility for the inhibition is likely due to the feedback inhibition of GA on the BR response, as lamina inclination was thought to be a BR-specific response. Despite the decreased cell length, rice BR-deficient mutants also have distorted cell organization, resulting in twisted or frizzled leaves (Hong et al., 2002; Mori et al., 2002). Thus, BR appears to have broader roles than GA in regulating rice growth at the seedling stage. The regulation on GA biosynthesis could be one of the downstream branches of the BR response pathway utilized to regulate cell elongation.

While BR has been widely used as a plant growth modulator in the field for over 30 years (Khripach et al., 2000), its effects on plants are perplexing, and conflicting results have been reported regarding its roles in several processes (Hu et al., 2000; Sasse, 2003; De Vleeschauwer et al., 2012; Wang, 2012; Serna, 2013). In contrast with its growth-promoting effect, exogenous BR application frequently leads to retarded growth; however, the detailed mechanism is unclear. According to our observations, the

ability of BR to inhibit or promote plant growth depends on multiple factors, including the treatment time, the hormone concentration used, and endogenous BR levels in a certain tissue. For example, a 2-d short-term treatment using even  $10^{-6}$  M BL can still upregulate the  $GA_1$  level ~2-fold as well as slightly increase leaf length (Supplemental Table 3 and Supplemental Figures 3C and 3D). In this case, high levels of BR inhibit its own biosynthesis and induce GA inactivation, which antagonizes the increased GA biosynthesis because of elevated *GA3ox-2* expression, eventually resulting in a subtle effect on plant growth. A long-term treatment would continuously strengthen the inhibition of both hormones, leading to growth inhibition. As we mainly used young seedlings as material in this study, it will be very interesting to test whether *GA2ox-1*, the functional homolog of *GA2ox-3* at the reproductive stage, is similarly regulated by BR, because reduced culm length has been frequently observed in rice plants that accumulate BR or exhibit enhanced BR signaling, such as *m107*, *Do-2*, *Gi-2*, *BU1ox*, *BAK1ox*, and *lic* (Supplemental Figure 3E). One more intriguing question is whether BR also modulates GA level to affect other processes like flowering and plant fertility.

Our results revealed a previously unknown mechanism underlying the crosstalk between the two hormones, which appears much different from that in *Arabidopsis*. In *Arabidopsis*, both the

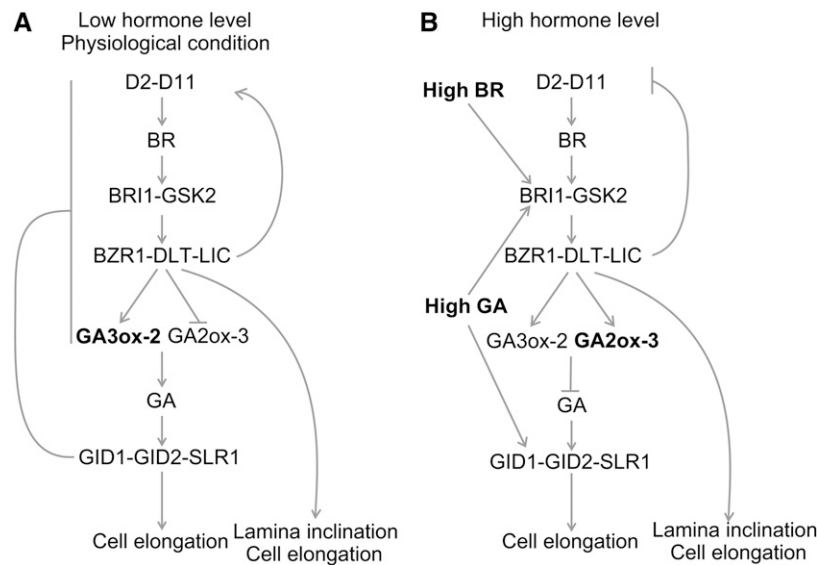

**Figure 10.** Proposed Model for BR-GA Crosstalk Based on This Study.

**(A)** Physiological BR induces GA biosynthesis, inhibits GA inactivation, and stimulates self-biosynthesis to promote cell elongation. As a feedback manner, GA inhibits BR responses and biosynthesis. BR also has other branches for promoting cell elongation or other specific actions.

**(B)** High BR levels promote GA inactivation and repress self-biosynthesis to inhibit cell elongation. High GA levels facilitate cell elongation via BR signaling.

Arrows indicate activation, and blunt arrows indicate inhibition.

BR-deficient mutant *de-etiolated2* and the weak BR-insensitive mutant *bri1-119* were found to be nearly completely insensitive to GA in terms of hypocotyl elongation (Bai et al., 2012; Gallego-Bartolomé et al., 2012), whereas in rice, both the BR-deficient plants (*d2*, *d11*, and BRZ-treated plants) and the BR-insensitive mutants (*d61-1*, *d61-2*, *Go-2*, and *dit*) have normal or even higher sensitivity to physiological GA than the wild type in terms of leaf sheath elongation. Mori et al. (2002) mentioned that *brd1*, the most severe BR-deficient mutant, has basically no leaf sheath elongation in response to GA but that the leaf blade elongated normally, as in the wild type. Our observation suggested that this is because *brd1*, as well as another allele termed *brd1-1* with similar severity (Hong et al., 2002), originally have no visible leaf sheath development (Supplemental Figures 7A and 7B). These results suggest that a basal BR level is essential for leaf sheath development. When we used *brd1-3*, a slightly weaker allele than *brd1* and *brd1-1* (Hong et al., 2002), to carry out a similar analysis, the leaf sheath as well as the leaf blade elongated normally, as in the wild type (Supplemental Figures 7C and 7D), demonstrating that GA function does not require BR biosynthesis. Thus, BR-induced BZR1 activation (including nuclear localization) is essential for the GA response in *Arabidopsis* but not in rice. Another possibility is that different tissues (hypocotyl and leaf sheath, respectively) were used for evaluation of the GA response, which may lead to different results.

Additionally, in contrast with the observation that GA supplementation enhances BR sensitivity in *Arabidopsis* (Bai et al., 2012), GA generally inhibits the BR response in rice in terms of lamina inclination, coleoptile elongation, and sheath and root growth. Indeed, we found that GA inhibits BZR1 protein level but

enhances GSK2 level, whereas GA induces BZR1 accumulation in *Arabidopsis* (Li et al., 2012). It should be emphasized that the feedback inhibition of BR response and biosynthesis by GA signaling that act far downstream of BR was thought to be a fine-tuning mechanism for hormone function, thus tending to be relatively weak. Despite these differences, however, our results are consistent with previous reports that BR induces GA biosynthesis in *Arabidopsis* and GA inhibits BR biosynthesis in *Arabidopsis* (Li et al., 2012; Lilley et al., 2013). Thus, BR might also promote GA biosynthesis to promote cell elongation in *Arabidopsis*. Moreover, in rice root, exogenous GA was found to repress BR biosynthesis, whereas BR was found to promote the expression of *GA2ox-3*, the GA inactivation gene (De Vleeschauwer et al., 2012). The authors speculated that BR regulates GA metabolism to inhibit root growth, which is consistent with our finding. Interestingly, our yeast two-hybrid analysis also showed an interaction between BZR1 and SLR1, the rice DELLA (Supplemental Figure 8), suggesting that BR and GA might exhibit crosstalk at multiple levels. Actually, in our model, the inhibition of BR biosynthetic genes by GA, as well as the involvement of BR-signaling components in response to high GA concentrations, could be partially explained by GA derepression of SLR1 inhibition on BZR1 activity.

Numerous BIN2/GSK2 substrates were identified in recent years, including a number of transcription factors (Vert et al., 2008; Tong et al., 2012; Ye et al., 2012; Zhang et al., 2012, 2014a, 2014b; Cho et al., 2014), suggesting that the negative regulator BIN2/GSK2 acts as the central player in the BR response, similar to most other hormone-signaling pathways (Huq, 2006). Our analysis combined with previous reports implied that these transcription factors,

such as BZR1, DLT, and LIC in rice, work together in a complex and dynamic manner to regulate GA homeostasis in response to different BR levels in various tissues (Figure 10). We cannot exclude the possibility that BR has other branched pathways, which are independent of GA biosynthesis and signaling, that promote cell elongation. Several studies have suggested that there is another BR signaling pathway independent of the BRI1 receptor, possibly involving components such as D1, BU1, and TAIHU DWARF1/ERECT LEAF1 (TUD1/ELF1) (Wang et al., 2006; Oki et al., 2009b; Tanaka et al., 2009; Hu et al., 2013; Sakamoto et al., 2013). Interestingly, D1 has also been suggested to be involved only in the high-sensitivity response of GA (i.e., in response to low concentrations of GA) (Ueguchi-Tanaka et al., 2000). By contrast, our study found that the primary BR signaling components (BRI1, GSK2, and DLT) are generally involved in the low-sensitivity response to GA (in response to high concentrations of GA). Thus, it is tempting to speculate that rice utilizes these two complementary pathways, the D1-TUD1-BU1 pathway and the BRI1-GSK2-DLT pathway, to completely fulfill both BR and GA responses.

Exogenous hormone application has been widely used to test plant sensitivity in phytohormone research. However, insufficient attention has been paid to the hormone concentrations used in the studies, partially because it is challenging to determine the incorporation efficiency of the applied hormone to plants. In our study, the assumed BR-specific-deficient mutants were found to have obviously decreased sensitivity to high GA levels, indicating that hormone concentrations are important when defining a hormone-sensitive or -insensitive mutant. In addition, different concentrations of hormone may have opposite effects on plant growth and development, especially when exogenously applied. Moreover, reduced plant height was frequently observed in BR accumulation or enhanced BR-signaling rice mutants. These phenomena strongly suggest that endogenous BR equilibrium has great significance for plant growth and development. However, in the case of GA, plants tend to have much higher tolerance to the hormone, at least in rice. Mutants deficient in DELLA protein (*slr1*) or transgenic plants that overexpress a GA biosynthetic gene (*GA20-1ox*) usually exhibit greatly increased stature. In addition, a concentration of  $10^{-4}$  M exogenous GA still greatly promotes rice growth. In young rice seedlings, this high GA level can even induce internode elongation (Ueguchi-Tanaka et al., 2000). Notably, various biological processes such as auxin and light responses were found to modulate GA metabolism and GA signaling to regulate plant growth (Jiang et al., 2007; Weiss and Ori, 2007; de Lucas et al., 2008; Yamaguchi, 2008; Chapman et al., 2012). Thus, GA-induced cell elongation should have great significance to rice plants, which in turn develop a low-sensitivity pathway in response to high hormone levels. It is very interesting that the available BR signaling components are used to differentially regulate the GA pathway for plant growth under various conditions.

In conclusion, our discoveries revealed a novel mechanism underlying BR and GA crosstalk depending on tissues and hormone levels, which has greatly advanced our understanding of hormone actions in crop plants and appears much different from that in *Arabidopsis*. Thus, this work will provide the basis for further agricultural application of the plant growth regulators as well as for future biotechnological breeding.

## METHODS

### Plant Materials and Culture Conditions

See Supplemental Table 1 for information about the rice (*Oryza sativa*) and *Arabidopsis thaliana* plants used in this study. Mutants were kindly provided by others, as follows: *brd1* by M. Mori (Mori et al., 2002) and *gid2*, *brd1-1*, and *brd1-3* by M. Matsuoka (Hong et al., 2002; Sasaki et al., 2003). Mutants were identified or developed in Q.Q.'s laboratory, including *d18-ld18<sup>a</sup>*, *d35*, *sd1*, *d2-2*, *d11-2*, *d61-1*, and *d61-2* (Itoh et al., 2001, 2004; Hong et al., 2003; Sakamoto et al., 2004; Tanabe et al., 2005). Other mutants or plants were identified or produced in our laboratory, including *eui1-4*, *dlt*, *Do-1*, *Do-2*, *Go-2*, *Gi-2*, *m107*, *gid1*, *slr1*, *GA20-1ox*, and *GA2-1ox* (Luo et al., 2006; Tong et al., 2009, 2012; Wan et al., 2009). Among them, *gid1*, *slr1*, *sd1*, *GA20-1ox*, and *GA2-1ox* were newly identified or produced. *gid1* carries a point mutation at 587 (G to T) of the *GID1* coding sequence, resulting in an amino acid change of glycine to valine. *slr1* carries a 1-bp deletion at 1101 (T) of the *SLR1* coding sequence, resulting in a frame shift. *sd1* carries a 7-bp deletion at 546 to 552 of the *SD1* coding sequence, resulting in a frame shift. Transgenic plants of *GA20-1ox* and *GA2-1ox* were produced by introducing the respective genes (*GA20ox-1* and *GA2ox-1*) driven by the maize (*Zea mays*) *Ubiquitin* promoter into wild-type plants. Plants were grown in the field under natural conditions or on half-strength Murashige and Skoog (MS) culture medium in a growth chamber at 30°C for 10 h (day/light) and at 28°C for 14 h (night/dark).

### Hormone and Hormone Inhibitor Treatments

BL (WAKO) and BRZ (TCI) were resolved in DMSO, and GA<sub>3</sub> and PAC (Sigma-Aldrich) were resolved in ethanol, to suitable concentrations as storage solutions. For the treatments, the chemical reagents were first diluted to 1,000-fold of the desired concentrations to a certain volume using their respective solvents and then added to culture medium at 1:1000 dilution to achieve the final concentrations. The identical volume of the blank solvent (DMSO or ethanol) was used as mock treatment. Unless specified,  $10^{-6}$  M BR,  $10^{-6}$  M GA,  $10^{-5}$  M PAC, and  $10^{-5}$  M BRZ were used for the treatments.

For physiological analysis, seeds were dehusked, and those with identical appearance were selected for further sterilization by immersing in 2% NaClO solution for 0.5 h. For GA sensitivity analysis, the sterilized seeds were first incubated in  $10^{-5}$  M PAC for 2 d to block the endogenous GA biosynthesis. The seeds were then directly sown on half-strength MS agar medium supplemented with or without hormones or inhibitors and grown for 10 d. Then, images of plants were taken for leaf angle measurement (ImageJ), and lengths of roots, coleoptiles, and leaf sheaths were measured for statistics. For gene expression analysis, germinated seeds were plated in half-strength MS hydroponic medium and grown in a growth chamber for 4 d, and then hormones were added to the medium and the plants were grown for another 2 d. The lamina inclination assay by the microdrop method was performed as described previously (Hong et al., 2003).

### Hormone Measurements

For Shi., *d11*, ZH11, *Go-2*, and *dlt*, germinated seeds were sown in field soil and grown for 1 month. Further measurements of ZH11, *Do*, *Nip.*, and *m107* were performed using 2-week-old plants grown in half-strength MS hydroponic medium in a growth chamber. For short-term BL treatment,  $10^{-6}$  M BL was added to the medium for 2 d before sampling. For long-term BL treatment,  $10^{-6}$  or  $10^{-5}$  M BL was supplemented in the culture medium after the plants had been allowed to grow for 2 d after germination and grown for an additional 1 week. About 4 g of shoots was harvested from the rice seedlings for GA measurements. Quantification of endogenous GAs was performed as described (Chen et al., 2012). Quantification of BR (CS) was performed as described previously (Ding et al., 2013).

### ChIP and Immunoblotting

One-week-old wild-type plants (ZH11) were used as materials for the ChIP assay according to a previous description with slight modification (Saleh et al., 2008). Briefly, ~4 g of rice seedling shoots was ground in liquid nitrogen, the powder was suspended in buffer, protein-DNA was cross-linked with formaldehyde, nuclei were isolated, DNA was sheared into 200- to 1000-bp fragments by sonication, protein-DNA complexes were immunoprecipitated with anti-BZR1 polyclonal antibody (1:100) and pulled down using Protein A magnetic beads (Invitrogen), the beads were washed and eluted, and cross-linking was reversed. The precipitated DNA was purified for further qPCR analysis.

Commercial anti-BZR1 and anti-GSK2 polyclonal antibodies (BPI) were used to detect BZR1 and GSK2 protein levels, respectively. Both antibodies were used at a dilution of 1:1000 for the analysis. Plant materials were ground into powder in liquid nitrogen, and then SDS-PAGE sample buffer was added. The samples were boiled and centrifuged, and the supernatants were resolved by SDS-PAGE. Immunoblotting was performed according to a general procedure.

### qRT-PCR and ChIP-qPCR

For gene expression analysis, shoots, the second leaf sheaths, and roots from 1-week-old seedlings were collected for RNA isolation using Trizol reagent (Invitrogen). First-strand cDNA was synthesized using a commercial kit (Toyobo). qRT-PCR was performed using SYBR Green-containing PCR mix (Roche) on a real-time PCR detection system (Bio-Rad CFX96). Rice *ACTIN1* was used as an internal reference for normalization. For ChIP-qPCR, the prepared DNA in ChIP was used as template and primer pairs designed to amplify fragments of 90 to 150 bp in length were used to detect protein binding. A segment spanning the rice *ACTIN1* intron with a 101-bp length was used as an internal reference for normalization, and enrichment fold of the protein binding DNA amount was calculated compared with the sample without antibody application. Three or four repeats were performed for each gene or region analyzed, and average values and *SD* are shown. Primer sequences were referred to in previous reports (Shimada et al., 2006; Dai et al., 2007; Tong et al., 2009) and are listed in Supplemental Table 6.

### Accession Numbers

Sequence data from this article can be found in the GenBank/EMBL data libraries under accession numbers AP003244 (D2), AB158759 (D11), AC096690 (GA20ox-1), AP003561 (GA20ox-2), AP002523 (GA3ox-2), AC119288 (GA2ox-1), AP003375 (GA2ox-3), AK106449 (DLT), and X16280 (ACTIN1).

### Supplemental Data

The following materials are available in the online version of this article.

**Supplemental Figure 1.** Exogenous BR Inhibits Cell Elongation in Leaf Sheath.

**Supplemental Figure 2.** GA Effect on Wild-Type Growth.

**Supplemental Figure 3.** Comparison of Plant Height of BR-Related Plants.

**Supplemental Figure 4.** Expression of *D2* and *D11* in Response to Various BR Levels in Shoot.

**Supplemental Figure 5.** Root Response to BR in GA-Related Mutants.

**Supplemental Figure 6.** The Effect of GA and PAC Application on GSK2 and BZR1 Protein Level.

**Supplemental Figure 7.** Response of *brd1* Alleles to GA Treatment.

**Supplemental Figure 8.** SLR1 Can Interact with Os BZR1 in Yeast.

**Supplemental Table 1.** Information of the Mutants and the Transgenic Plants Used in This Study.

**Supplemental Table 2.** Quantification of GA<sub>1</sub> in Wild-Type and *Do* Plants.

**Supplemental Table 3.** Quantification of GAs in Wild-Type, *m107*, and Short-Term BL-Treated Plants.

**Supplemental Table 4.** Quantification of CS in Wild-Type and *m107* Plants.

**Supplemental Table 5.** Quantification of GAs in Wild-Type and Long-Term BL-Treated Plants.

**Supplemental Table 6.** Primers Used for qRT-PCR and ChIP-qPCR Analysis.

### ACKNOWLEDGMENTS

We thank M. Mori (National Institute of Agrobiological Sciences, Japan) for providing *brd1* seeds and M. Matsuoka (Nagoya University) for providing *gid2*, *brd1-1*, and *brd1-3* mutants. We thank S. Cao and G. Li (Institute of Genetics and Developmental Biology, Chinese Academy of Sciences) for plant transformation and field management. We also thank Yuqi Feng (Wuhan University) and his team for all the GA and BR measurements. This work was supported by the National Natural Science Foundation of China (Grants 31170715 and 91335203) and the State Key Laboratory of Plant Genomics (Grant 2013B0125-01).

### AUTHOR CONTRIBUTIONS

H.T. and C.C. designed the study, analyzed the data, and wrote the article. H.T. and Y.X. performed gene and protein expression analysis, physiological analysis, ChIP assay, and transgenic experiment. D.L. and Y.J. assisted in physiological analysis. Y.Y. assisted in ChIP assay, data analysis, and article preparation. L.L., S.G., and Q.Q. provided assistance in mutant identification and transgenic plant development. H.T. performed all the other studies.

Received September 14, 2014; revised September 14, 2014; accepted October 15, 2014; published November 4, 2014.

### REFERENCES

- Bai, M.Y., Shang, J.X., Oh, E., Fan, M., Bai, Y., Zentella, R., Sun, T.P., and Wang, Z.Y. (2012). Brassinosteroid, gibberellin and phytochrome impinge on a common transcription module in *Arabidopsis*. *Nat. Cell Biol.* **14**: 810–817.
- Bai, M.Y., Zhang, L.Y., Gampala, S.S., Zhu, S.W., Song, W.Y., Chong, K., and Wang, Z.Y. (2007). Functions of OsBZR1 and 14-3-3 proteins in brassinosteroid signaling in rice. *Proc. Natl. Acad. Sci. USA* **104**: 13839–13844.
- Bouquin, T., Meier, C., Foster, R., Nielsen, M.E., and Mundy, J. (2001). Control of specific gene expression by gibberellin and brassinosteroid. *Plant Physiol.* **127**: 450–458.
- Chapman, E.J., Greenham, K., Castillejo, C., Sartor, R., Bialy, A., Sun, T.P., and Estelle, M. (2012). Hypocotyl transcriptome reveals auxin regulation of growth-promoting genes through GA-dependent and -independent pathways. *PLoS ONE* **7**: e36210.

- Chen, M.L., Fu, X.M., Liu, J.Q., Ye, T.T., Hou, S.Y., Huang, Y.Q., Yuan, B.F., Wu, Y., and Feng, Y.Q. (2012). Highly sensitive and quantitative profiling of acidic phytohormones using derivatization approach coupled with nano-LC-ESI-Q-TOF-MS analysis. *J. Chromatogr. B Analyt. Technol. Biomed. Life Sci.* **905**: 67–74.
- Cho, H., et al. (2014). A secreted peptide acts on BIN2-mediated phosphorylation of ARFs to potentiate auxin response during lateral root development. *Nat. Cell Biol.* **16**: 66–76.
- Dai, M., Zhao, Y., Ma, Q., Hu, Y., Hedden, P., Zhang, Q., and Zhou, D.X. (2007). The rice *YABBY1* gene is involved in the feedback regulation of gibberellin metabolism. *Plant Physiol.* **144**: 121–133.
- de Lucas, M., Davière, J.M., Rodríguez-Falcón, M., Pontin, M., Iglesias-Pedraz, J.M., Lorrain, S., Fankhauser, C., Blázquez, M.A., Titarenko, E., and Prat, S. (2008). A molecular framework for light and gibberellin control of cell elongation. *Nature* **451**: 480–484.
- De Vleeschauwer, D., Van Buyten, E., Satoh, K., Balidion, J., Mauleon, R., Choi, I.R., Vera-Cruz, C., Kikuchi, S., and Höfte, M. (2012). Brassinosteroids antagonize gibberellin- and salicylate-mediated root immunity in rice. *Plant Physiol.* **158**: 1833–1846.
- Dill, A., Jung, H.S., and Sun, T.P. (2001). The DELLA motif is essential for gibberellin-induced degradation of RGA. *Proc. Natl. Acad. Sci. USA* **98**: 14162–14167.
- Ding, J., Mao, L.J., Wang, S.T., Yuan, B.F., and Feng, Y.Q. (2013). Determination of endogenous brassinosteroids in plant tissues using solid-phase extraction with double layered cartridge followed by high-performance liquid chromatography-tandem mass spectrometry. *Phytochem. Anal.* **24**: 386–394.
- Duan, K., Li, L., Hu, P., Xu, S.P., Xu, Z.H., and Xue, H.W. (2006). A brassinolide-suppressed rice MADS-box transcription factor, OsMDP1, has a negative regulatory role in BR signaling. *Plant J.* **47**: 519–531.
- Fàbregas, N., Li, N., Boeren, S., Nash, T.E., Goshe, M.B., Clouse, S.D., de Vries, S., and Caño-Delgado, A.I. (2013). The brassinosteroid insensitive1-like3 signalosome complex regulates *Arabidopsis* root development. *Plant Cell* **25**: 3377–3388.
- Feng, S., et al. (2008). Coordinated regulation of *Arabidopsis thaliana* development by light and gibberellins. *Nature* **451**: 475–479.
- Gallego-Bartolomé, J., Minguet, E.G., Grau-Enguix, F., Abbas, M., Locascio, A., Thomas, S.G., Alabadi, D., and Blázquez, M.A. (2012). Molecular mechanism for the interaction between gibberellin and brassinosteroid signaling pathways in *Arabidopsis*. *Proc. Natl. Acad. Sci. USA* **109**: 13446–13451.
- Gallego-Giraldo, L., Ubeda-Tomás, S., Gisbert, C., García-Martínez, J.L., Moritz, T., and López-Díaz, I. (2008). Gibberellin homeostasis in tobacco is regulated by gibberellin metabolism genes with different gibberellin sensitivity. *Plant Cell Physiol.* **49**: 679–690.
- Gomi, K., Sasaki, A., Itoh, H., Ueguchi-Tanaka, M., Ashikari, M., Kitano, H., and Matsuoka, M. (2004). GID2, an F-box subunit of the SCF E3 complex, specifically interacts with phosphorylated SLR1 protein and regulates the gibberellin-dependent degradation of SLR1 in rice. *Plant J.* **37**: 626–634.
- González-García, M.P., Vilarrasa-Blasi, J., Zhiponova, M., Divol, F., Mora-García, S., Russinova, E., and Caño-Delgado, A.I. (2011). Brassinosteroids control meristem size by promoting cell cycle progression in *Arabidopsis* roots. *Development* **138**: 849–859.
- Gudesblat, G.E., Schneider-Pizoñ, J., Betti, C., Mayerhofer, J., Vanhoutte, I., van Dongen, W., Boeren, S., Zhiponova, M., de Vries, S., Jonak, C., and Russinova, E. (2012). SPEECHLESS integrates brassinosteroid and stomata signalling pathways. *Nat. Cell Biol.* **14**: 548–554.
- He, J.X., Gendron, J.M., Sun, Y., Gampala, S.S., Gendron, N., Sun, C.Q., and Wang, Z.Y. (2005). BZR1 is a transcriptional repressor with dual roles in brassinosteroid homeostasis and growth responses. *Science* **307**: 1634–1638.
- He, J.X., Gendron, J.M., Yang, Y., Li, J., and Wang, Z.Y. (2002). The GSK3-like kinase BIN2 phosphorylates and destabilizes BZR1, a positive regulator of the brassinosteroid signaling pathway in *Arabidopsis*. *Proc. Natl. Acad. Sci. USA* **99**: 10185–10190.
- Hedden, P., and Phillips, A.L. (2000). Gibberellin metabolism: New insights revealed by the genes. *Trends Plant Sci.* **5**: 523–530.
- Hong, Z., Ueguchi-Tanaka, M., and Matsuoka, M. (2004). Brassinosteroids and rice architecture. *J. Pestic. Sci.* **29**: 184–188.
- Hong, Z., et al. (2002). Loss-of-function of a rice brassinosteroid biosynthetic enzyme, C-6 oxidase, prevents the organized arrangement and polar elongation of cells in the leaves and stem. *Plant J.* **32**: 495–508.
- Hong, Z., Ueguchi-Tanaka, M., Umemura, K., Uozu, S., Fujioka, S., Takatsuto, S., Yoshida, S., Ashikari, M., Kitano, H., and Matsuoka, M. (2003). A rice brassinosteroid-deficient mutant, *ebisu dwarf (d2)*, is caused by a loss of function of a new member of cytochrome P450. *Plant Cell* **15**: 2900–2910.
- Hu, X., Qian, Q., Xu, T., Zhang, Y., Dong, G., Gao, T., Xie, Q., and Xue, Y. (2013). The U-box E3 ubiquitin ligase TUD1 functions with a heterotrimeric G $\alpha$  subunit to regulate brassinosteroid-mediated growth in rice. *PLoS Genet.* **9**: e1003391.
- Hu, Y., Bao, F., and Li, J. (2000). Promotive effect of brassinosteroids on cell division involves a distinct CycD3-induction pathway in *Arabidopsis*. *Plant J.* **24**: 693–701.
- Huq, E. (2006). Degradation of negative regulators: A common theme in hormone and light signaling networks? *Trends Plant Sci.* **11**: 4–7.
- Ikeda, A., Ueguchi-Tanaka, M., Sonoda, Y., Kitano, H., Koshioka, M., Futsuhara, Y., Matsuoka, M., and Yamaguchi, J. (2001). *slender rice*, a constitutive gibberellin response mutant, is caused by a null mutation of the *SLR1* gene, an ortholog of the height-regulating gene *GAI/RGA/RHT/D8*. *Plant Cell* **13**: 999–1010.
- Itoh, H., Tatsumi, T., Sakamoto, T., Otomo, K., Toyomasu, T., Kitano, H., Ashikari, M., Ichihara, S., and Matsuoka, M. (2004). A rice semi-dwarf gene, *Tan-Ginbozu (D35)*, encodes the gibberellin biosynthesis enzyme, ent-kaurene oxidase. *Plant Mol. Biol.* **54**: 533–547.
- Itoh, H., Ueguchi-Tanaka, M., Sentoku, N., Kitano, H., Matsuoka, M., and Kobayashi, M. (2001). Cloning and functional analysis of two gibberellin 3 beta-hydroxylase genes that are differently expressed during the growth of rice. *Proc. Natl. Acad. Sci. USA* **98**: 8909–8914.
- Jager, C.E., Symons, G.M., Ross, J.J., Smith, J.J., and Reid, J.B. (2005). The brassinosteroid growth response in pea is not mediated by changes in gibberellin content. *Planta* **221**: 141–148.
- Jiang, C., Gao, X., Liao, L., Harberd, N.P., and Fu, X. (2007). Phosphate starvation root architecture and anthocyanin accumulation responses are modulated by the gibberellin-DELLA signaling pathway in *Arabidopsis*. *Plant Physiol.* **145**: 1460–1470.
- Kaneko, M., Itoh, H., Inukai, Y., Sakamoto, T., Ueguchi-Tanaka, M., Ashikari, M., and Matsuoka, M. (2003). Where do gibberellin biosynthesis and gibberellin signaling occur in rice plants? *Plant J.* **35**: 104–115.
- Khripach, V., Zhabiniskii, V., and De Groot, A. (2000). Twenty years of brassinosteroids: Steroidal plant hormones warrant better crops for the XXI century. *Ann. Bot. (Lond.)* **86**: 441–447.
- Kim, T.W., Guan, S., Burlingame, A.L., and Wang, Z.Y. (2011). The CDG1 kinase mediates brassinosteroid signal transduction from BRI1 receptor kinase to BSU1 phosphatase and GSK3-like kinase BIN2. *Mol. Cell* **43**: 561–571.
- Kim, T.W., Michniewicz, M., Bergmann, D.C., and Wang, Z.Y. (2012). Brassinosteroid regulates stomatal development by GSK3-mediated inhibition of a MAPK pathway. *Nature* **482**: 419–422.
- Lee, S., Choi, S.C., and An, G. (2008). Rice SVP-group MADS-box proteins, OsMADS22 and OsMADS55, are negative regulators of brassinosteroid responses. *Plant J.* **54**: 93–105.



- Li, D., Wang, L., Wang, M., Xu, Y.Y., Luo, W., Liu, Y.J., Xu, Z.H., Li, J., and Chong, K. (2009). Engineering *OsBAK1* gene as a molecular tool to improve rice architecture for high yield. *Plant Biotechnol. J.* **7**: 791–806.
- Li, J., and Nam, K.H. (2002). Regulation of brassinosteroid signaling by a GSK3/SHAGGY-like kinase. *Science* **295**: 1299–1301.
- Li, J., Nam, K.H., Vafeados, D., and Chory, J. (2001). *BIN2*, a new brassinosteroid-insensitive locus in *Arabidopsis*. *Plant Physiol.* **127**: 14–22.
- Li, Q.F., Wang, C., Jiang, L., Li, S., Sun, S.S.M., and He, J.X. (2012). An interaction between BZR1 and DELLAs mediates direct signaling crosstalk between brassinosteroids and gibberellins in *Arabidopsis*. *Sci. Signal.* **5**: ra72.
- Lilley, J.L.S., Gan, Y., Graham, I.A., and Nemhauser, J.L. (2013). The effects of DELLAs on growth change with developmental stage and brassinosteroid levels. *Plant J.* **76**: 165–173.
- Luo, A., et al. (2006). *EUI1*, encoding a putative cytochrome P450 monooxygenase, regulates internode elongation by modulating gibberellin responses in rice. *Plant Cell Physiol.* **47**: 181–191.
- Mora-García, S., Vert, G., Yin, Y., Caño-Delgado, A., Cheong, H., and Chory, J. (2004). Nuclear protein phosphatases with Kelch-repeat domains modulate the response to brassinosteroids in *Arabidopsis*. *Genes Dev.* **18**: 448–460.
- Mori, M., Nomura, T., Ooka, H., Ishizaka, M., Yokota, T., Sugimoto, K., Okabe, K., Kajiwara, H., Satoh, K., Yamamoto, K., Hirochika, H., and Kikuchi, S. (2002). Isolation and characterization of a rice dwarf mutant with a defect in brassinosteroid biosynthesis. *Plant Physiol.* **130**: 1152–1161.
- Müssig, C., Shin, G.H., and Altmann, T. (2003). Brassinosteroids promote root growth in *Arabidopsis*. *Plant Physiol.* **133**: 1261–1271.
- Nam, K.H., and Li, J. (2002). BRI1/BAK1, a receptor kinase pair mediating brassinosteroid signaling. *Cell* **110**: 203–212.
- Nomura, T., Hanada, A., Zhu, Y.Y., He, Z.H., Mander, L., Kamiya, Y., and Yamaguchi, S. (2006). ELONGATED UPPERMOST INTERNODE epoxidizes gibberellins in a novel deactivation reaction in rice. *Plant Cell Physiol.* **47**: S144.
- Oki, K., Inaba, N., Kitagawa, K., Fujioka, S., Kitano, H., Fujisawa, Y., Kato, H., and Iwasaki, Y. (2009a). Function of the alpha subunit of rice heterotrimeric G protein in brassinosteroid signaling. *Plant Cell Physiol.* **50**: 161–172.
- Oki, K., Kitagawa, K., Fujisawa, Y., Kato, H., and Iwasaki, Y. (2009b). Function of alpha subunit of heterotrimeric G protein in brassinosteroid response of rice plants. *Plant Signal. Behav.* **4**: 126–128.
- Sakamoto, T., et al. (2004). An overview of gibberellin metabolism enzyme genes and their related mutants in rice. *Plant Physiol.* **134**: 1642–1653.
- Sakamoto, T., Kitano, H., and Fujioka, S. (2013). An E3 ubiquitin ligase, ERECT LEAF1, functions in brassinosteroid signaling of rice. *Plant Signal. Behav.* **8**: e27117.
- Saleh, A., Alvarez-Venegas, R., and Avramova, Z. (2008). An efficient chromatin immunoprecipitation (ChIP) protocol for studying histone modifications in *Arabidopsis* plants. *Nat. Protoc.* **3**: 1018–1025.
- Sasaki, A., Itoh, H., Gomi, K., Ueguchi-Tanaka, M., Ishiyama, K., Kobayashi, M., Jeong, D.H., An, G., Kitano, H., Ashikari, M., and Matsuoka, M. (2003). Accumulation of phosphorylated repressor for gibberellin signaling in an F-box mutant. *Science* **299**: 1896–1898.
- Sasse, J.M. (2003). Physiological actions of brassinosteroids: An update. *J. Plant Growth Regul.* **22**: 276–288.
- Serna, L. (2013). What causes opposing actions of brassinosteroids on stomatal development? *Plant Physiol.* **162**: 3–8.
- Shimada, A., Ueguchi-Tanaka, M., Sakamoto, T., Fujioka, S., Takatsuto, S., Yoshida, S., Sazuka, T., Ashikari, M., and Matsuoka, M. (2006). The rice *SPINDLY* gene functions as a negative regulator of gibberellin signaling by controlling the suppressive function of the DELLA protein, SLR1, and modulating brassinosteroid synthesis. *Plant J.* **48**: 390–402.
- Sun, Y., et al. (2010). Integration of brassinosteroid signal transduction with the transcription network for plant growth regulation in *Arabidopsis*. *Dev. Cell* **19**: 765–777.
- Tanabe, S., Ashikari, M., Fujioka, S., Takatsuto, S., Yoshida, S., Yano, M., Yoshimura, A., Kitano, H., Matsuoka, M., Fujisawa, Y., Kato, H., and Iwasaki, Y. (2005). A novel cytochrome P450 is implicated in brassinosteroid biosynthesis via the characterization of a rice dwarf mutant, *dwarf11*, with reduced seed length. *Plant Cell* **17**: 776–790.
- Tanaka, A., et al. (2009). *BRASSINOSTEROID UPREGULATED1*, encoding a helix-loop-helix protein, is a novel gene involved in brassinosteroid signaling and controls bending of the lamina joint in rice. *Plant Physiol.* **151**: 669–680.
- Tang, W., Kim, T.W., Osés-Prieto, J.A., Sun, Y., Deng, Z., Zhu, S., Wang, R., Burlingame, A.L., and Wang, Z.Y. (2008). BSKs mediate signal transduction from the receptor kinase BRI1 in *Arabidopsis*. *Science* **321**: 557–560.
- Tang, W., et al. (2011). PP2A activates brassinosteroid-responsive gene expression and plant growth by dephosphorylating BZR1. *Nat. Cell Biol.* **13**: 124–131.
- Tong, H., and Chu, C. (2012). Brassinosteroid signaling and application in rice. *J. Genet. Genomics* **39**: 3–9.
- Tong, H., Jin, Y., Liu, W., Li, F., Fang, J., Yin, Y., Qian, Q., Zhu, L., and Chu, C. (2009). DWARF AND LOW-TILLERING, a new member of the GRAS family, plays positive roles in brassinosteroid signaling in rice. *Plant J.* **58**: 803–816.
- Tong, H., Liu, L., Jin, Y., Du, L., Yin, Y., Qian, Q., Zhu, L., and Chu, C. (2012). DWARF AND LOW-TILLERING acts as a direct downstream target of a GSK3/SHAGGY-like kinase to mediate brassinosteroid responses in rice. *Plant Cell* **24**: 2562–2577.
- Tsuji, H., Ueguchi-Tanaka, M., Nakajima, M., Ashikari, M., Kitano, H., Yamaguchi, I., and Matsuoka, M. (2006). Interaction among SLR1, GID1, and GID2 in the gibberellin signaling pathway in rice cells. *Plant Cell Physiol.* **47**: S125.
- Ueguchi-Tanaka, M., Ashikari, M., and Matsuoka, M. (2006). Gibberellin perception and its signaling in rice. *Plant Cell Physiol.* **47**: S6.
- Ueguchi-Tanaka, M., Ashikari, M., Nakajima, M., Itoh, H., Katoh, E., Kobayashi, M., Chow, T.Y., Hsing, Y.I.C., Kitano, H., Yamaguchi, I., and Matsuoka, M. (2005). *GIBBERELLIN INSENSITIVE DWARF1* encodes a soluble receptor for gibberellin. *Nature* **437**: 693–698.
- Ueguchi-Tanaka, M., Fujisawa, Y., Kobayashi, M., Ashikari, M., Iwasaki, Y., Kitano, H., and Matsuoka, M. (2000). Rice dwarf mutant *d1*, which is defective in the alpha subunit of the heterotrimeric G protein, affects gibberellin signal transduction. *Proc. Natl. Acad. Sci. USA* **97**: 11638–11643.
- Ueguchi-Tanaka, M., Nakajima, M., Katoh, E., Ohmiya, H., Asano, K., Saji, S., Hongyu, X., Ashikari, M., Kitano, H., Yamaguchi, I., and Matsuoka, M. (2007). Molecular interactions of a soluble gibberellin receptor, GID1, with a rice DELLA protein, SLR1, and gibberellin. *Plant Cell* **19**: 2140–2155.
- Vert, G., Walcher, C.L., Chory, J., and Nemhauser, J.L. (2008). Integration of auxin and brassinosteroid pathways by Auxin Response Factor 2. *Proc. Natl. Acad. Sci. USA* **105**: 9829–9834.
- Wan, S., et al. (2009). Activation tagging, an efficient tool for functional analysis of the rice genome. *Plant Mol. Biol.* **69**: 69–80.
- Wang, L., Wang, Z., Xu, Y., Joo, S.H., Kim, S.K., Xue, Z., Xu, Z., Wang, Z., and Chong, K. (2009). *OsGSR1* is involved in crosstalk between gibberellins and brassinosteroids in rice. *Plant J.* **57**: 498–510.
- Wang, L., Xu, Y., Zhang, C., Ma, Q., Joo, S.H., Kim, S.K., Xu, Z., and Chong, K. (2008). *OsLIC*, a novel CCCH-type zinc finger protein

- with transcription activation, mediates rice architecture via brassinosteroids signaling. *PLoS ONE* **3**: e3521.
- Wang, L., Xu, Y.Y., Li, J., Powell, R.A., Xu, Z.H., and Chong, K.** (2007). Transgenic rice plants ectopically expressing *AtBAK1* are semi-dwarfed and hypersensitive to 24-epibrassinolide. *J. Plant Physiol.* **164**: 655–664.
- Wang, L., Xu, Y.Y., Ma, Q.B., Li, D., Xu, Z.H., and Chong, K.** (2006). Heterotrimeric G protein alpha subunit is involved in rice brassinosteroid response. *Cell Res.* **16**: 916–922.
- Wang, X., and Chory, J.** (2006). Brassinosteroids regulate dissociation of BKI1, a negative regulator of BRI1 signaling, from the plasma membrane. *Science* **313**: 1118–1122.
- Wang, Z.Y.** (2012). Brassinosteroids modulate plant immunity at multiple levels. *Proc. Natl. Acad. Sci. USA* **109**: 7–8.
- Wang, Z.Y., Bai, M.Y., Oh, E., and Zhu, J.Y.** (2012). Brassinosteroid signaling network and regulation of photomorphogenesis. *Annu. Rev. Genet.* **46**: 701–724.
- Wang, Z.Y., Seto, H., Fujioka, S., Yoshida, S., and Chory, J.** (2001). BRI1 is a critical component of a plasma-membrane receptor for plant steroids. *Nature* **410**: 380–383.
- Weiss, D., and Ori, N.** (2007). Mechanisms of cross talk between gibberellin and other hormones. *Plant Physiol.* **144**: 1240–1246.
- Yamaguchi, S.** (2008). Gibberellin metabolism and its regulation. *Annu. Rev. Plant Biol.* **59**: 225–251.
- Yamamoto, C., Ihara, Y., Wu, X., Noguchi, T., Fujioka, S., Takatsuto, S., Ashikari, M., Kitano, H., and Matsuoka, M.** (2000). Loss of function of a rice *brassinosteroid insensitive1* homolog prevents internode elongation and bending of the lamina joint. *Plant Cell* **12**: 1591–1606.
- Ye, H., Li, L., Guo, H., and Yin, Y.** (2012). MYBL2 is a substrate of GSK3-like kinase BIN2 and acts as a corepressor of BES1 in brassinosteroid signaling pathway in *Arabidopsis*. *Proc. Natl. Acad. Sci. USA* **109**: 20142–20147.
- Yin, Y., Wang, Z.Y., Mora-Garcia, S., Li, J., Yoshida, S., Asami, T., and Chory, J.** (2002). BES1 accumulates in the nucleus in response to brassinosteroids to regulate gene expression and promote stem elongation. *Cell* **109**: 181–191.
- Yu, X., Li, L., Zola, J., Aluru, M., Ye, H., Foudree, A., Guo, H., Anderson, S., Aluru, S., Liu, P., Rodermel, S., and Yin, Y.** (2011). A brassinosteroid transcriptional network revealed by genome-wide identification of BES1 target genes in *Arabidopsis thaliana*. *Plant J.* **65**: 634–646.
- Zhang, C., Xu, Y., Guo, S., Zhu, J., Huan, Q., Liu, H., Wang, L., Luo, G., Wang, X., and Chong, K.** (2012). Dynamics of brassinosteroid response modulated by negative regulator LIC in rice. *PLoS Genet.* **8**: e1002686.
- Zhang, D., Ye, H., Guo, H., Johnson, A., Lin, H., and Yin, Y.** (2014a). Transcription factors involved in brassinosteroid repressed gene expression and their regulation by BIN2 kinase. *Plant Signal. Behav.* **9**: e27849.
- Zhang, D., Ye, H., Guo, H., Johnson, A., Zhang, M., Lin, H., and Yin, Y.** (2014b). Transcription factor HAT1 is phosphorylated by BIN2 kinase and mediates brassinosteroid repressed gene expression in *Arabidopsis*. *Plant J.* **77**: 59–70.
- Zhao, S.Q., Hu, J., Guo, L.B., Qian, Q., and Xue, H.W.** (2010). Rice leaf inclination2, a VIN3-like protein, regulates leaf angle through modulating cell division of the collar. *Cell Res.* **20**: 935–947.
- Zhu, Y., et al.** (2006). *ELONGATED UPPERMOST INTERNODE* encodes a cytochrome P450 monooxygenase that epoxidizes gibberellins in a novel deactivation reaction in rice. *Plant Cell* **18**: 442–456.
